# 1 Nano-scale Architecture of Blood-Brain Barrier Tight-Junctions

2 Esther Sasson<sup>1</sup>, Shira Anzi<sup>1</sup>, Batia Bell<sup>1</sup>, Oren Yakovian<sup>2</sup>, Meshi Zorsky<sup>3</sup>, Urban Deutsch<sup>4</sup>,  
3 Britta Engelhardt<sup>4</sup>, Eilon Sherman<sup>2</sup>, Gad D. Vatine<sup>3</sup>, Ron Dzikowski<sup>5</sup>, Ayal Ben-Zvi<sup>1\*</sup>.

4

5 1. Department of Developmental Biology and Cancer Research, The Institute for Medical  
6 Research Israel-Canada, Faculty of Medicine, Hebrew University of Jerusalem, Jerusalem  
7 91120, Israel

8

9 2. Racah Institute of Physics, The Hebrew University, Jerusalem 9190401, Israel

10

11 3. The Department of Physiology and Cell Biology, Faculty of Health Sciences, The  
12 Regenerative Medicine and Stem Cell (RMSC) research Center and the Zlotowski Center for  
13 Neuroscience, Ben-Gurion University of the Negev, Beer Sheva 84105, Israel

14

15 4. Theodor Kocher Institute, University of Bern, Bern, Switzerland.

16

17 5. Department of Microbiology and Molecular Genetics, The Kuvin Center for the Study of  
18 Infectious and Tropical Diseases, IMRIC, Faculty of Medicine, Hebrew University of  
19 Jerusalem, Jerusalem 91120, Israel.

20

21

22 \* **Address correspondence to:**

23 Ayal Ben-Zvi, PhD

24 Department of Developmental Biology and Cancer Research,

25 The Institute for Medical Research Israel-Canada,

26 Faculty of Medicine,

27 Hebrew University of Jerusalem,

28 Jerusalem 91120, Israel

29 Tel: +972-2-6787624

30 Email: [Ayalb@ekmd.huji.ac.il](mailto:Ayalb@ekmd.huji.ac.il)

## 31 **Abstract**

32 **Tight junctions (TJs) between blood-brain barrier (BBB) endothelial cells construct**  
33 **a robust physical barrier, whose damage underlies BBB dysfunctions related to several**  
34 **neurodegenerative diseases. What makes these highly specialized BBB-TJs extremely**  
35 **restrictive remains unknown. Here, we use super-resolution microscopy (dSTORM) to**  
36 **uncover new structural and functional properties of BBB TJs. Focusing on three major**  
37 **components, Nano-scale resolution revealed sparse (occludin) vs. clustered**  
38 **(ZO1/claudin-5) molecular architecture. Developmentally, permeable TJs become first**  
39 **restrictive to large molecules, and only later to small molecules, with claudin-5 proteins**  
40 **arrangement compacting during this maturation process. Mechanistically, we reveal**  
41 **that ZO1 clustering is independent of claudin-5 *in-vivo*. In contrast to accepted**  
42 **knowledge, we found that in the developmental context, total levels of claudin-5**  
43 **inversely correlate with TJ functionality. Our super-resolution studies provide a unique**  
44 **perspective of BBB TJs and open new directions for understanding TJ functionality in**  
45 **biological barriers, ultimately enabling restoration in disease or modulation for drug**  
46 **delivery.**

47

## 48 **Introduction**

49 The blood-brain barrier (BBB) was identified when dye/tracer injected into the blood  
50 circulation reached the majority of body tissues but failed to penetrate the brain (Hagan &  
51 Ben-Zvi, 2015). Endothelial cells (ECs) were identified as the core component of the  
52 mammalian BBB when electron microscopy (EM) allowed imaging of fine ultra-structural  
53 cell-biology components of BBB cells (Brightman & Reese, 1969; Reese & Karnovsky,  
54 1967). Horseradish-peroxidase (HRP) used as an EM compatible tracer revealed that BBB  
55 ECs lack fenestrations (openings traversing the entire cell width) and exhibit extremely low

56 rates of transcytosis (vesicular transport), both mediating intracellular permeability in  
57 peripheral ECs. A central discovery of these studies was that tight junctions (TJs) between  
58 neighboring ECs are responsible for intercellular restrictive barrier properties (Brightman &  
59 Reese, 1969; Reese & Karnovsky, 1967). Ever since, BBB TJs became a major focus of the  
60 BBB research field; TJs modulation is explored as means to enhance brain drug delivery, and  
61 TJs damage is investigated to better understand underlying BBB dysfunctions implicated in  
62 diseases (neurodegenerative, neuro-inflammatory, trauma etc. (Bauer, Krizbai, Bauer, &  
63 Traweger, 2014; Greene et al., 2018; Hagan & Ben-Zvi, 2015; Kealy, Greene, & Campbell,  
64 2018; Knowland et al., 2014; Liebner et al., 2018; Sweeney, Sagare, & Zlokovic, 2018; Zhao,  
65 Nelson, Betsholtz, & Zlokovic, 2015; Zlokovic, 2008)).

66 Several gene families encoding integral membrane proteins (e.g occludin, junctional  
67 adhesion molecules (JAMs), claudins, and tricellulins (LSR/Marveld)) and adaptors that link  
68 TJs to the cytoskeleton (such as zonula occludens (ZO)), participate in constructing BBB TJs  
69 (Bauer et al., 2014; Furuse, Fujita, Hiiragi, Fujimoto, & Tsukita, 1998; Furuse et al., 1993;  
70 Haseloff, Dithmer, Winkler, Wolburg, & Blasig, 2015; Knowland et al., 2014; Langen,  
71 Ayloo, & Gu, 2019; Martin-Padura et al., 1998; Morita, Sasaki, Furuse, & Tsukita, 1999;  
72 Nitta et al., 2003; Sohet et al., 2015). Immunofluorescence and imaging with conventional  
73 light microscopy provided insights into the molecular components of TJs. Nevertheless, these  
74 approaches do not enable proper resolution for nano-scale imaging of TJ architecture.  
75 Electron microscopy on the other hand, provides superb resolution to image cellular structures  
76 but is much less effective in simultaneously localizing multiple proteins and tracer molecules,  
77 limiting our ability to study the molecular architecture of TJs. In order to bridge the gap  
78 between these two imaging methodologies and overcome their limitations, we developed an  
79 approach to image the BBB with direct stochastic optical reconstruction microscopy  
80 (dSTORM (van de Linde et al., 2011)) and study TJs at the nano-scale level.

## 81 **Results**

### 82 **Super-resolution microscopy of endothelial tight junctions**

83 We hypothesized that effective imaging of multiple TJ proteins organized in a very tight  
84 spatial localization could be achieved with dSTORM. To evaluate this approach we used  
85 bEND.3 cells (a mouse brain-derived endothelioma cell-line), cultured *in vitro* to form a  
86 confluent monolayer. These cells were shown to form TJs in a gradual process that includes  
87 translocation of claudin-5 from cytoplasmic and general membrane localizations to the cell  
88 boundaries in contact between adjacent cells (Koto et al., 2007). We confirmed these  
89 observations with immunofluorescence labeling claudin-5 and ZO1 in several time points  
90 after the cultures reached confluence state (Fig. 1a). Previous studies also demonstrated that  
91 during this process, claudin-5 expression is increased reaching maximal levels by three days  
92 post-confluence. The monolayer trans-endothelial electrical resistance (TEER), a proxy for TJ  
93 function reflecting intercellular restrictive properties, is elevated reaching maximal levels by  
94 seven days post-confluence (Koto et al., 2007).

95 We therefore further investigated two states: post-confluence (3-7 days post-confluence)  
96 and super-confluence (more than 11 days post-confluence). Using antibodies against claudin-  
97 5 and ZO1 for immunofluorescence and dSTORM imaging, we demonstrated a new layer of  
98 complexity in TJ organization (Fig. 1b-e). Most TJ studies use the term ‘strands’ to describe  
99 the organization of TJ proteins in a continuous line around the boundaries of the cells (as seen  
100 in Fig. 1a). Super resolution imaging allowed us to demonstrate that both claudin-5 (green)  
101 and ZO1 (red) are not organized in continuous lines but rather in disrupted lines with discrete  
102 clusters, forming bead-like structures (Fig. 1b). A pronounced change was found in the  
103 organization of the two TJ proteins at the cell-cell contacts: at post-confluence, signals along  
104 the membrane were more diffused, forming elongated clusters and ZO1 signals intermingled  
105 with claudin-5 signals (Fig. 1b, arrows). In contrast, at super-confluence, claudin-5 signals

106 along the membrane became concentrated in more discrete and shorter foci, flanking ZO1  
107 signals (Fig. 1b, arrowheads).

108 Target proteins labeled with antibodies imaged with dSTORM produced resolved signals  
109 representing an amplification of actual target numbers (see methods for details). Resolution of  
110 approximately 20 nm allowed us to separate signals and to use these as proxies for the  
111 abundance of target molecules, which could be used to compare different states. To quantify  
112 the differences in TJ architecture during this *in vitro* process, we analyzed the images using a  
113 custom clustering Matlab code to measure cluster area and number of signals per cluster.  
114 These were used to calculate the signal densities for each cluster (see clustering simulation  
115 Fig. 1c and methods for details). We could detect a clear shift towards smaller clusters with  
116 more claudin-5 signals per cluster at super-confluence (Fig. 1d). Clusters with higher numbers  
117 of signals were more abundant at this late state, especially in clusters with area smaller than  
118  $0.3 \mu\text{m}^2$ . Average signal density (per cluster) was also higher at the super-confluence state  
119 (~4-fold, Fig. 1e,  $P < 0.0001$ ).

120

**Figure 1**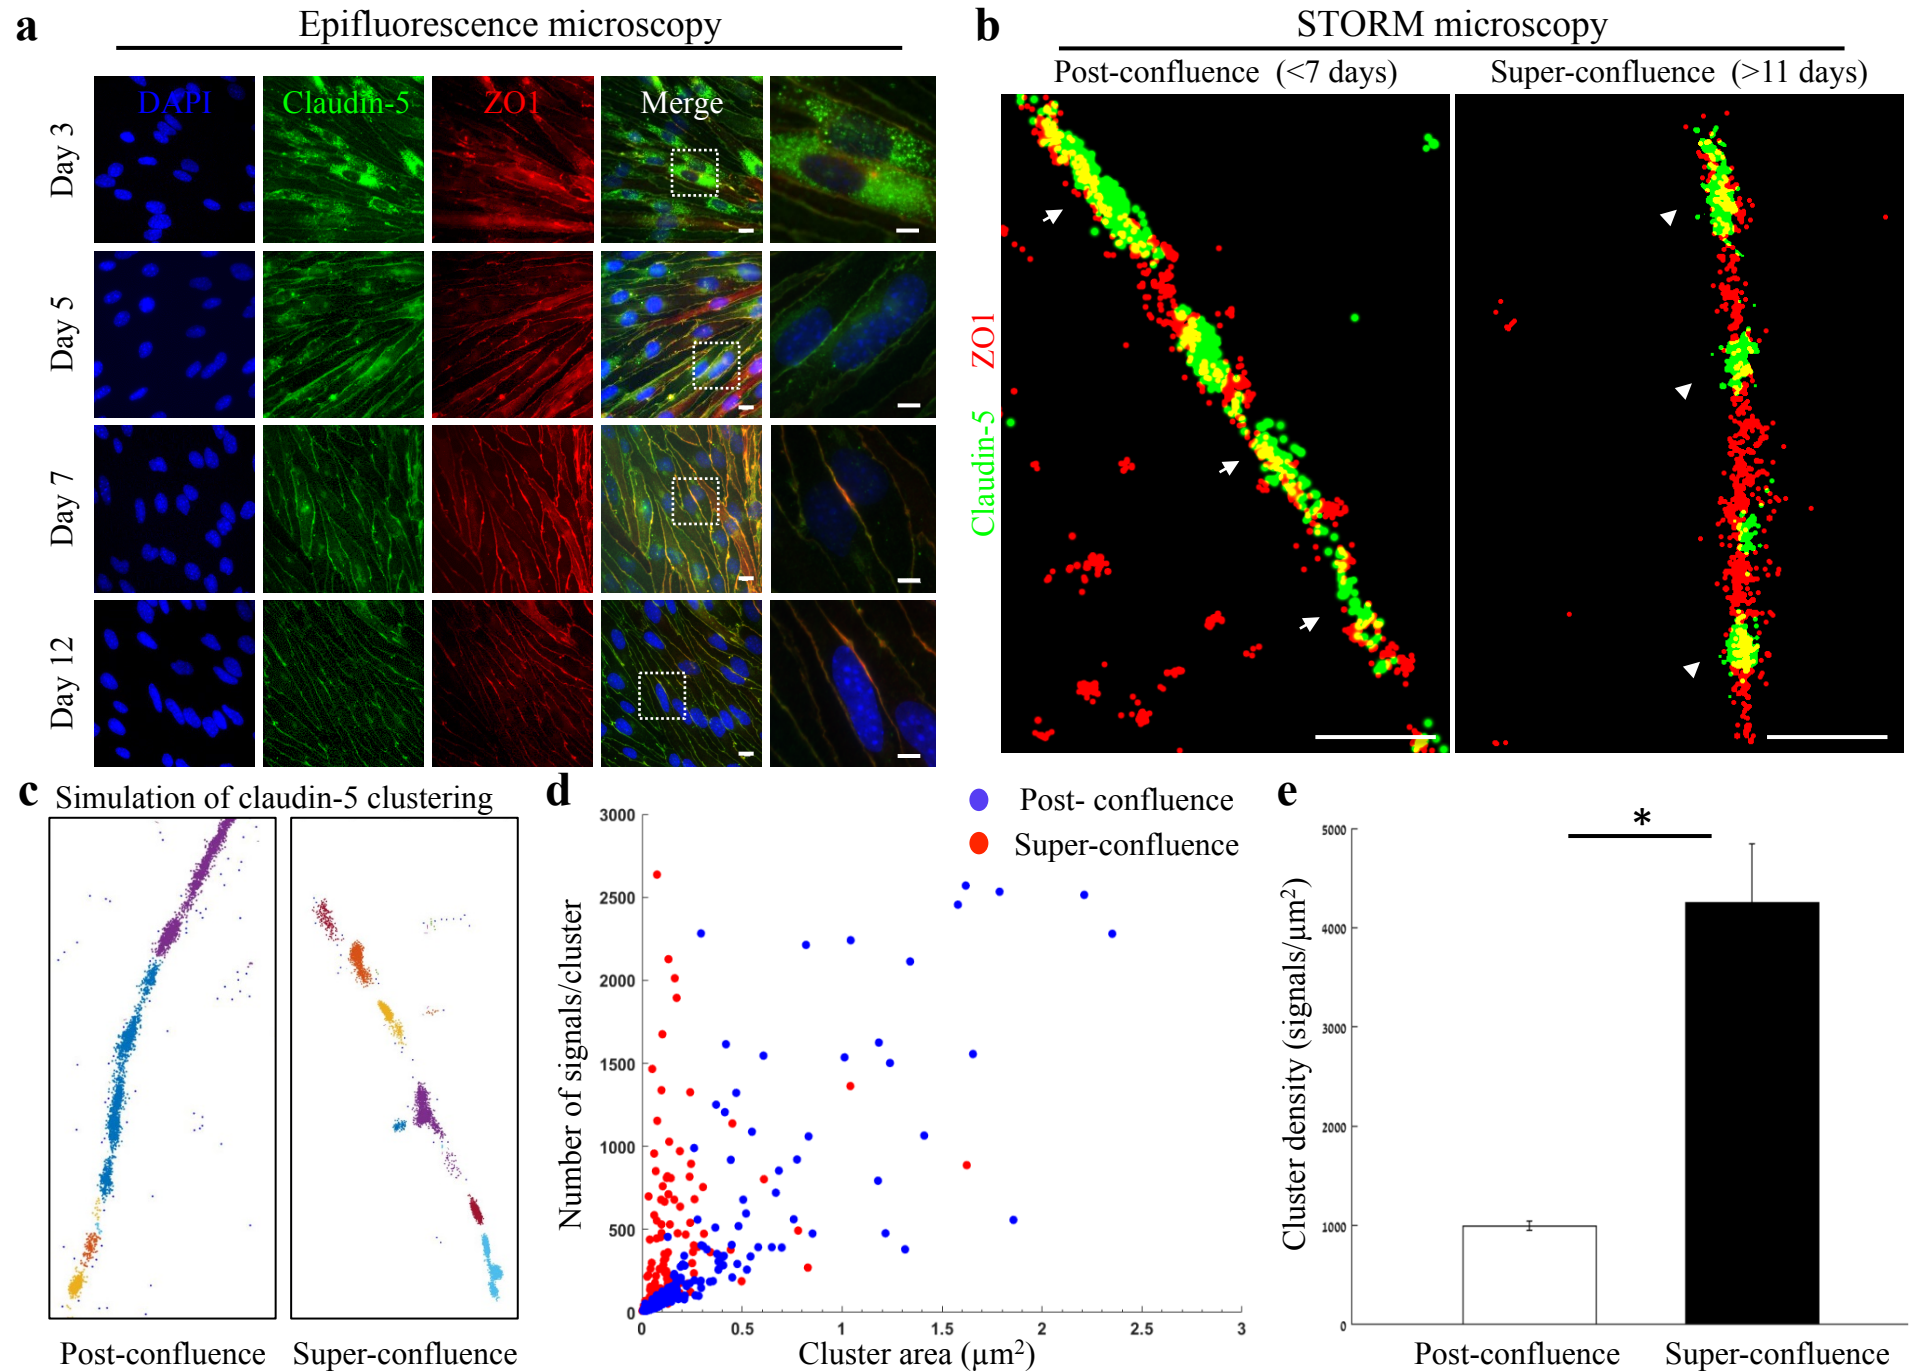

121 **Fig. 1: Super-resolution microscopy of endothelial tight junctions.** *In vitro* process of TJ  
122 maturation is accompanied by TJ architectural changes characterized by the formation of  
123 smaller, denser and more discrete clusters of TJ proteins. **a**, Epi-fluorescent imaging of  
124 claudin-5 (green) and ZO1 (red) immunostaining of bEND.3 cells in indicated time points  
125 after the cultures reached confluence state. Note translocation of claudin-5 from cytoplasmic  
126 localizations into continuous lines around the boundaries of the cells (known as ‘strands’),  
127 along the *in vitro* maturation process. Scale bars, 10  $\mu\text{m}$  and 5  $\mu\text{m}$  in insets. **b**, dSTORM  
128 imaging (Gaussian visualization) of claudin-5 (green) and ZO1 (red) immunostaining of  
129 bEND.3 cells confluent monolayers. TJ proteins form bead-like structures, especially in the  
130 super-confluence state. Claudin-5 signals are more concentrated in discrete and shorter foci  
131 (flanking ZO1 signals, arrowheads, right) than in the post-confluence state (arrows, left).  
132 During maturation TJ proteins translocate from different cellular locations (left) almost  
133 exclusively into the lateral cell membranes (right). Scale bar, 1  $\mu\text{m}$ . **c**, Examples of dSTORM  
134 imaging simulation of claudin-5 in bEND.3 cells used for quantifications of clustering  
135 properties (produced by a custom clustering Matlab code, see methods for details). Signals  
136 were defined to be clustered if their 2D location was smaller than 70 nm threshold distance.  
137 Cluster pattern visualization showing all points that belong to the same cluster with the same  
138 identifying color. **d**, Quantifications of claudin-5 clustering properties showed a shift towards  
139 smaller clusters with more claudin-5 signals per cluster at the super-confluence state. Clusters  
140 with higher numbers of signals were more abundant at this late state, especially in clusters  
141 with area smaller than  $0.3 \mu\text{m}^2$ . **e**, Average claudin-5 cluster density was  $\sim 4$ -fold higher at the  
142 super-confluence state than in the post-confluence state ( $n=183$  clusters (post-confluence) and  
143 281 clusters (super-confluence) in 5 independent experiments). Data are mean $\pm$ s.e.m. \* $P <$   
144 0.05 (Two tailed Mann–Whitney U-test).

145 We further investigated nano-architectural changes in the *in vitro* context of claudin-5  
146 expression and tight junction function. In line with previous publications (Koto et al., 2007),  
147 we could confirm that total claudin-5 protein levels in bEND.3 cells rise with time in culture  
148 (Fig. S1a). Nevertheless, we found that in general, bEND.3 monolayer trans-endothelial  
149 electrical resistance (TEER) is relatively low ( $\sim 40\text{-}100 \Omega\text{cm}^2$ ). Therefore, we turned to an  
150 alternative *in vitro* system that presents substantially superior barrier features with  
151 pronounced TJ function and TEER levels closer to those estimated for the *in vivo* levels:  
152 human iPSC differentiation into brain microvascular endothelial-like cells (iBMECs)  
153 (Lippmann, Al-Ahmad, Azarin, Palecek, & Shusta, 2014; Lippmann et al., 2012; Vatine et al.,  
154 2017; Vatine et al., 2019). In our culturing conditions TEER levels started at  $\sim 500\text{-}1000$   
155  $\Omega\text{cm}^2$  already a day after seeding. We monitored TEER and upon a noticeable elevation of  
156 approximately an additional  $\sim 1000 \Omega\text{cm}^2$  (2-3 days in culture), we measured claudin-5  
157 protein levels with western blot, permeability in transwells, and in parallel imaged cultures  
158 with STORM (Fig 2). We noticed that TJ function was improving, with TEER elevation (Fig.  
159 2a, S1b) and flux decrease (Fig. 2b), but could not detect noticeable changes in claudin-5  
160 protein levels. STORM imaging revealed that only clustered organization of claudin-5 could  
161 be found in these cells (Fig. 2c), and that pronounced change in nano-scale organization of  
162 claudin-5 clusters could be observed; clusters were smaller in area and denser (Fig. 2d-f)  
163 along with improvement in TJ function. The majority of cluster areas were smaller than  $0.1$   
164  $\mu\text{m}^2$ , and the average signal density (per cluster) was higher with elevated TEER ( $\sim 2.3$ -fold,  
165 Fig. 1f,  $P < 0.01$ ). In general, clusters of claudin-5 are much denser in iBMECs compared to  
166 bEND.3 cells ( $\sim 8$  fold denser), which correlates with differences in TEER.

167 Altogether, we suggest that the *in vitro* process of TJ maturation is accompanied by TJ  
168 nano-architectural changes characterized by the formation of smaller, denser and more  
169 discrete clusters of TJ proteins.



**Figure 2**

STORM microscopy

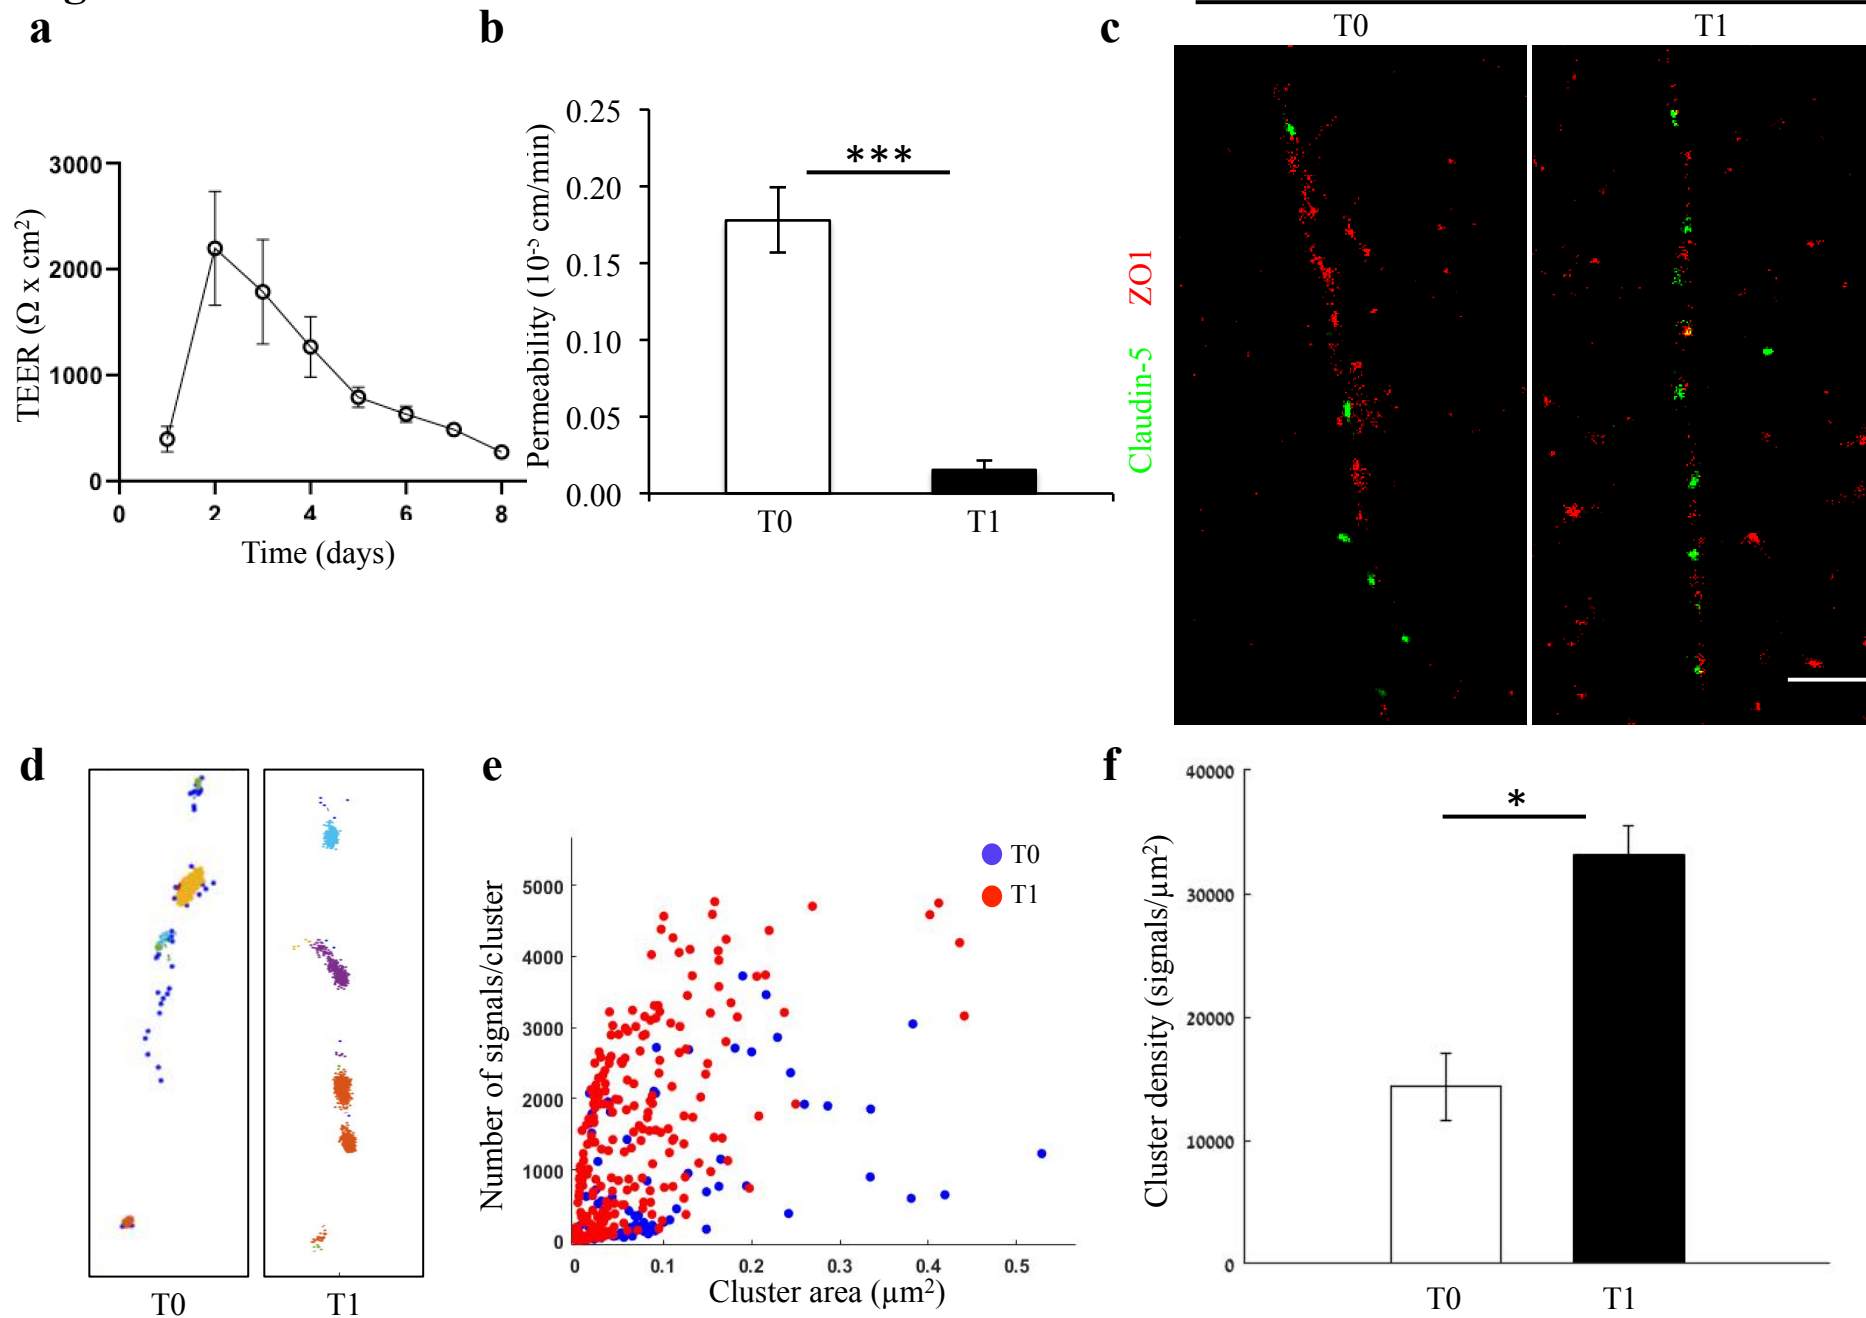

170 **Fig. 2: Changes in nano-scale architecture correlates with tight junction function.**

171 Enhanced TJ function is accompanied by formation of smaller and denser clusters of claudin-  
172 5. **a**, Enhanced TJ function demonstrated by increase in TEER, along the first days of induced  
173 human brain microvascular endothelial-like cell (iBMEC) culture (n=4 experiments/12  
174 inserts. TEER here shows data of a representative experiment. For average change in TEER  
175 across all experiments see Supplementary Figure S1b. n=4 inserts for permeability). **b**,  
176 Enhanced TJ function demonstrated by reduced permeability to sodium fluorescein (T0  
177 represents low TEER and T1 represents high TEER states, n=4 inserts). Data are mean  $\pm$  SD.  
178 \*\*\* P<0.0003 (two tailed pair t- test). **c**, dSTORM imaging (Gaussian visualization) of  
179 claudin-5 (green) and ZO1 (red) immunostaining in iBMEC confluent monolayers. Claudin-5  
180 signals are concentrated in discrete and short foci at both time points. Scale bar, 1  $\mu$ m. **d**,  
181 Examples of dSTORM imaging simulation of claudin-5 in iBMECs used for quantifications  
182 of clustering properties (produced by a custom clustering Matlab code, see methods for  
183 details). Cluster pattern visualization showing all points that belong to the same cluster with  
184 the same identifying color. **e**, Quantifications of claudin-5 clustering properties showed a shift  
185 towards smaller clusters with more claudin-5 signals per cluster along the improvement in TJ  
186 function. **f**, Average claudin-5 cluster density more than doubled (from 14,341 to 33,141  
187 signals/ $\mu$ m<sup>2</sup>) with the improvement in TJ function (n=90 clusters (in lower TEER) and 278  
188 clusters (in higher TEER) in triplicate cultures of two independent experiments). Data are  
189 mean  $\pm$  s.e.m. \*P < 0.01 (two tailed Mann–Whitney U-test).

190

191

192 **Molecular organization of mouse cortical BBB TJs**

193 To determine if the organization of TJ components observed *in vitro* occurs also in the  
194 brain, we developed a technique that enabled dSTORM imaging of BBB TJ in brain tissue  
195 sections (see methods for details). First we used fluorescent circulating tracers (Fig. 3b) and  
196 co-staining of claudin-5 together with the endothelial-specific transcription factor ERG (Fig.  
197 3c) and showed that claudin-5 dSTORM signals are exclusively localized to vascular  
198 structures. We found that similar to the *in vitro* data, claudin-5 exhibits clustered organization  
199 also *in vivo*, demonstrated in both cross and sagittal sections of cortical capillaries (of post-  
200 natal mice, Fig. 4b). The considerably improved resolution of dSTORM imaging could be  
201 appreciated when compared to epi-fluorescent images at very high magnifications of the same  
202 capillary, under the same microscope settings (Fig. 4b, 5a).

203

**Figure 3**

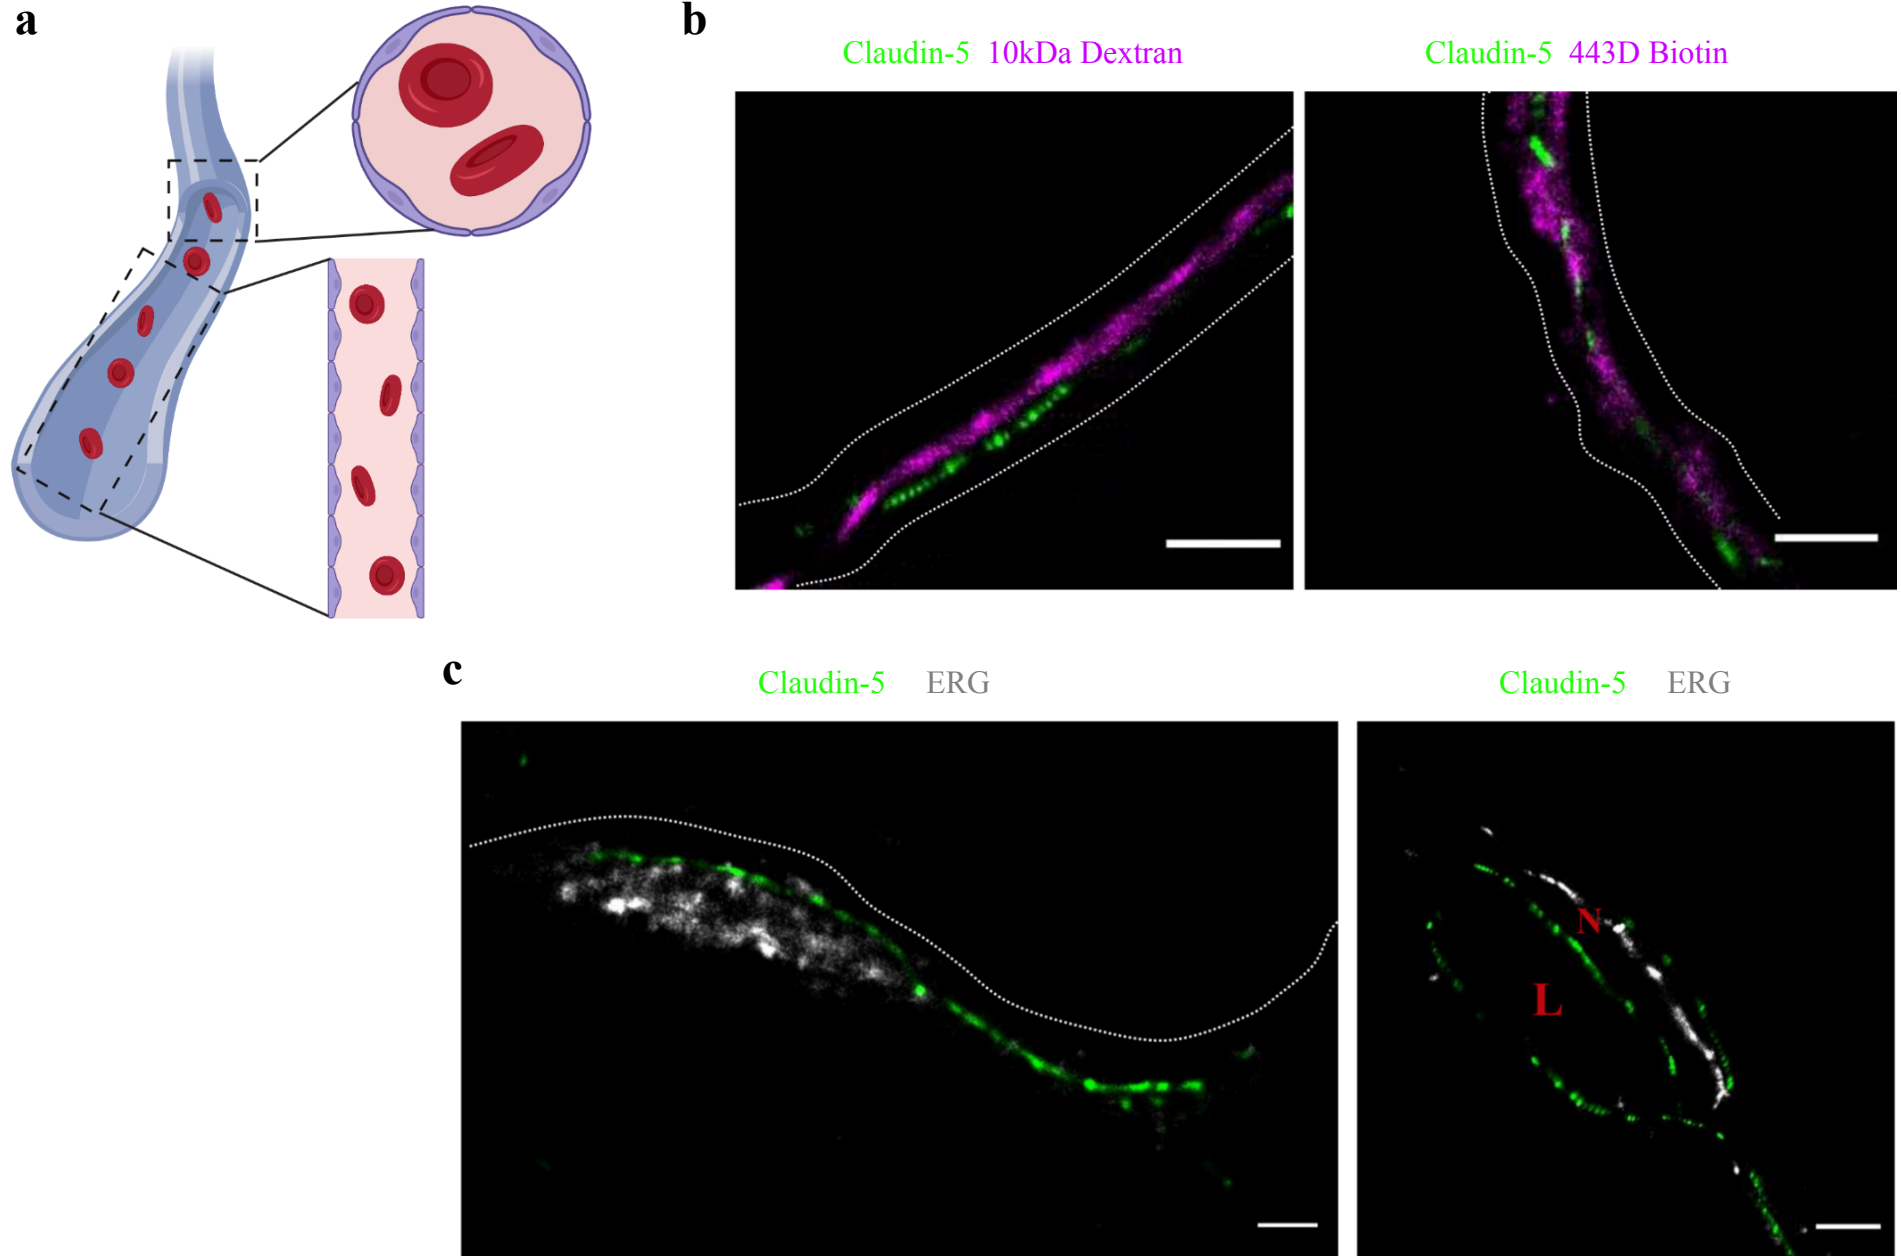

204 **Fig. 3: Claudin-5 signals in dSTORM imaging are exclusively localized to vascular**  
205 **structures.** dSTORM imaging in cortical fixed tissue sections of post-natal day 9 mice. **a,**  
206 Illustration of a vascular structure with cross versus sagittal section directions, and the  
207 projected orientation of endothelial cells contact points. **b,** Claudin-5 staining (green) together  
208 with fluorescent circulating tracers (10 kDa dextran, and ~443 Dalton sulfo-NHS-biotin,  
209 magenta) are used to demarcate sagittal views of elongated vessels (dashed line, Scale bars, 1  
210  $\mu\text{m}$ ). **c,** Staining for claudin-5 (green) together with the endothelial-specific transcription  
211 factor ERG (gray) showing capillary cross and sagittal sections (Scale bars, 1  $\mu\text{m}$ ). L –  
212 capillary lumen, N – endothelial nucleus.  $n > 30$  capillaries.  
213

**Figure 4**

**a**

Epifluorescence low magnification

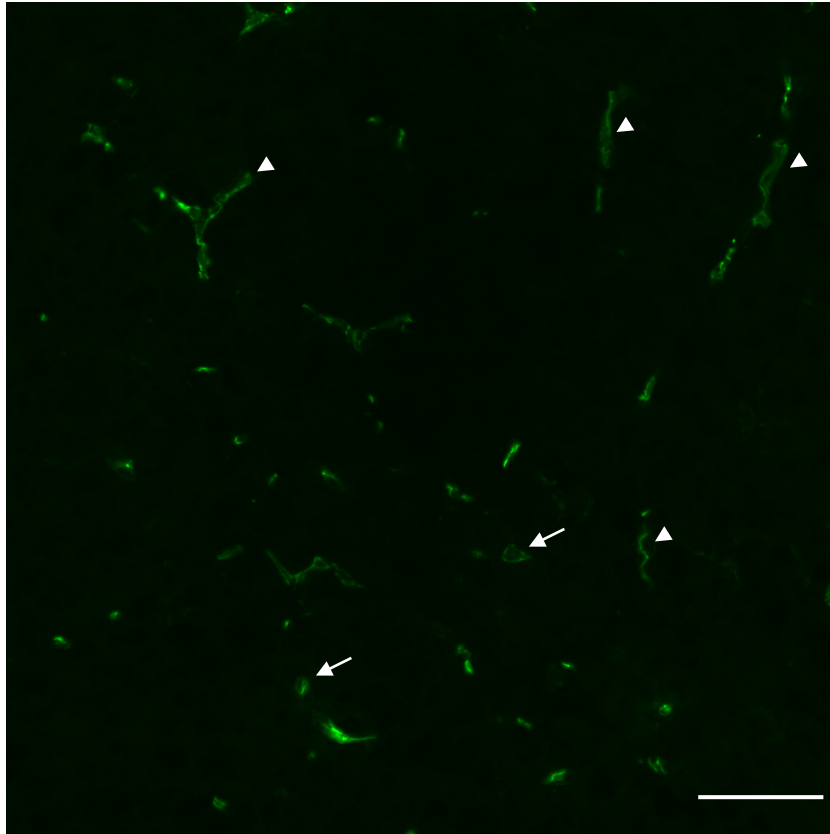

**b**

Epifluorescence

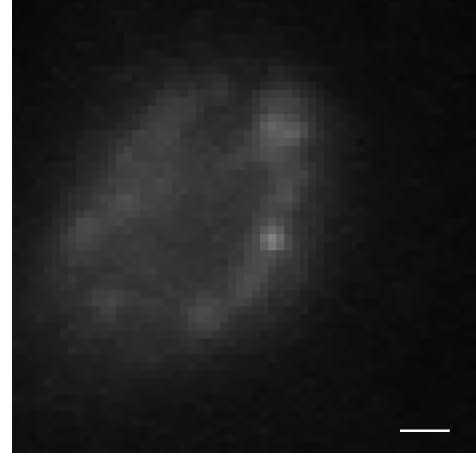

STORM

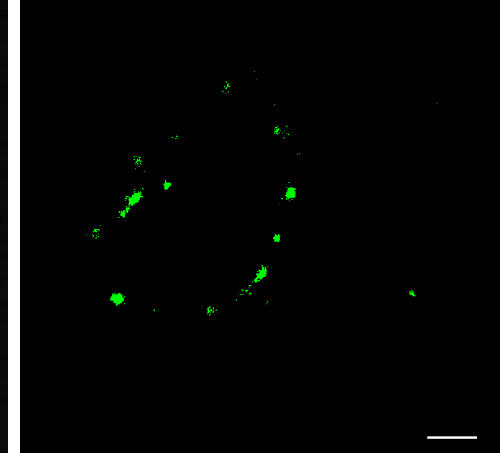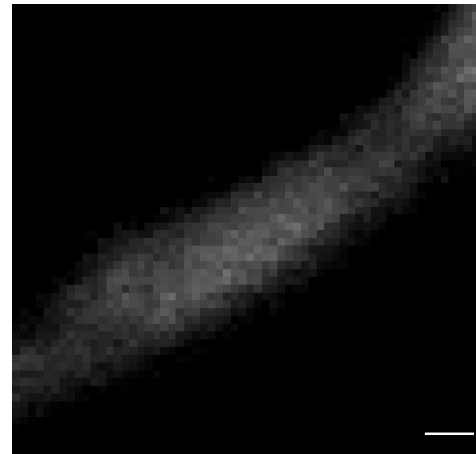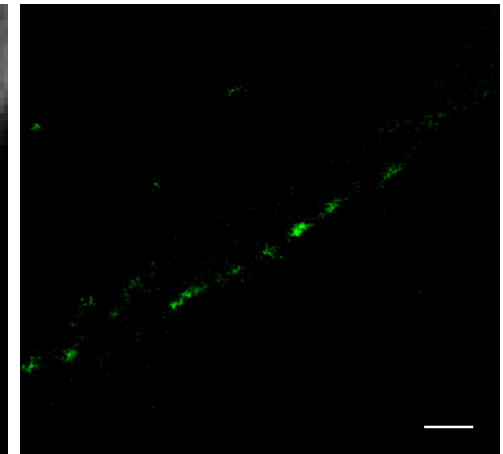

214 **Fig. 4: Claudin-5 exhibits clustered organization in cortical capillaries.** Imaging in  
215 cortical fixed tissue sections of post-natal day 9 mice. **a**, Low magnification view of claudin-5  
216 staining imaged by epi-fluorescent microscopy showing vascular fragments in cross-sections  
217 (arrows) or in sagittal-sections (arrowheads, scale bar, 50  $\mu\text{m}$ ). **b**, Claudin-5 exhibits clustered  
218 organization *in vivo*; dSTORM (right) compared to epi-fluorescent images (left) of claudin-5  
219 immunostaining in P9 cortical capillary cross-section (upper panel) or sagittal- section (lower  
220 panel) (scale bars, 1  $\mu\text{m}$ ),  $n>30$  capillaries.

221

222 Embryonic and post-natal development of the BBB provides an opportunity to investigate  
223 *in vivo* TJs maturation; as cortical capillaries acquire their restrictive barrier properties along a  
224 gradual developmental process (Ben-Zvi et al., 2014; Butt, Jones, & Abbott, 1990; Daneman,  
225 Zhou, Kebede, & Barres, 2010; Hagan & Ben-Zvi, 2015; Langen et al., 2019; Saunders,  
226 Liddelow, & Dziegielewska, 2012; Sohet et al., 2015). From mouse embryonic day 12 (E12)  
227 until E15, we and others have previously shown that the newly formed cortical capillaries  
228 have not yet acquired their full restrictive barrier properties (Ben-Zvi et al., 2014; Daneman et  
229 al., 2010). We therefore compared claudin-5 organization at E12 and at post-natal day 9 (P9)  
230 by analyzing cellular abundance and clustering properties (Fig 5, S2). We assumed that E12  
231 capillaries had a more defused claudin-5 appearance with longer clusters (Fig. 5a, arrow), but  
232 further analysis revealed that these were composed of many small clusters with relatively  
233 small gaps between them (example of the two types of clustering simulations, Fig. S2a).  
234 Claudin-5 clustering properties analysis showed that there were about 2.6 times more discrete  
235 clusters per capillary at E12 than at P9 (657 vs. 246 clusters in a set of 20 capillaries of each  
236 age, Fig. 5b). Capillary diameter was also significantly larger in E12 than in P9 (Fig 5a,c;  
237  $11.1\pm 0.47 \mu\text{m}$  and  $5.9\pm 0.39 \mu\text{m}$  respectively (mean $\pm$ s.e.m),  $P<0.0001$ ), which might explain  
238 the difference in numbers of clusters per capillary.

239 Distribution of claudin-5 clusters area in E12 capillaries was skewed towards smaller  
240 clusters (with no dramatic difference between the distributions, Fig. 5b). There was no  
241 dramatic difference also in the distribution of signals per cluster (Fig. 5b) or signal densities  
242 between the two groups (Fig. S2b). Thus there were no obvious changes in claudin-5  
243 clustering properties that correlated with changes in TJs maturation.

244 In addition to changes in capillary diameter the total number of claudin-5 signals per  
245 capillary was significantly higher in E12 than at P9 ( $14,341 \pm 1,257$  and  $3,590 \pm 372$   
246 respectively (mean $\pm$ s.e.m),  $P < 0.0001$ , Fig. 5c). Normalizing the total number of signals per  
247 capillary to its diameter (displayed as ‘Normalized cellular Claudin-5’, Fig. 5c,d) resulted in a  
248 similar significant difference (Fig. 5d). Based on this result we suggest that the total cellular  
249 amount of claudin-5 is not a strong predictor of TJ functionality. Our conclusion relates to the  
250 developmental and early post-natal BBB (reflected in our data), which might be distinct from  
251 the adult BBB.

252



**Figure 5**

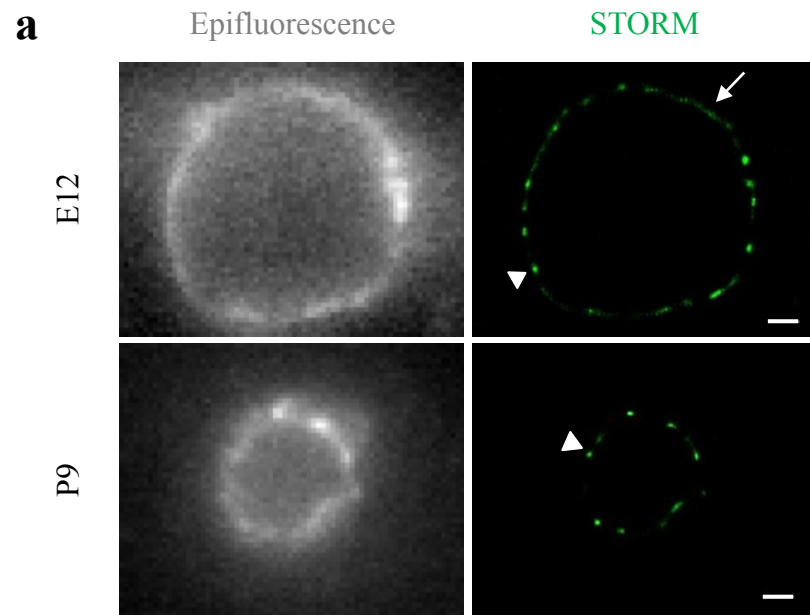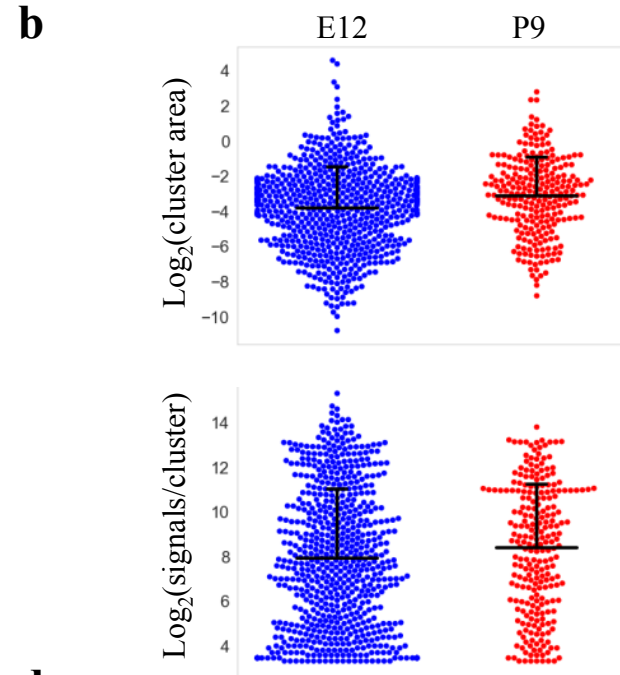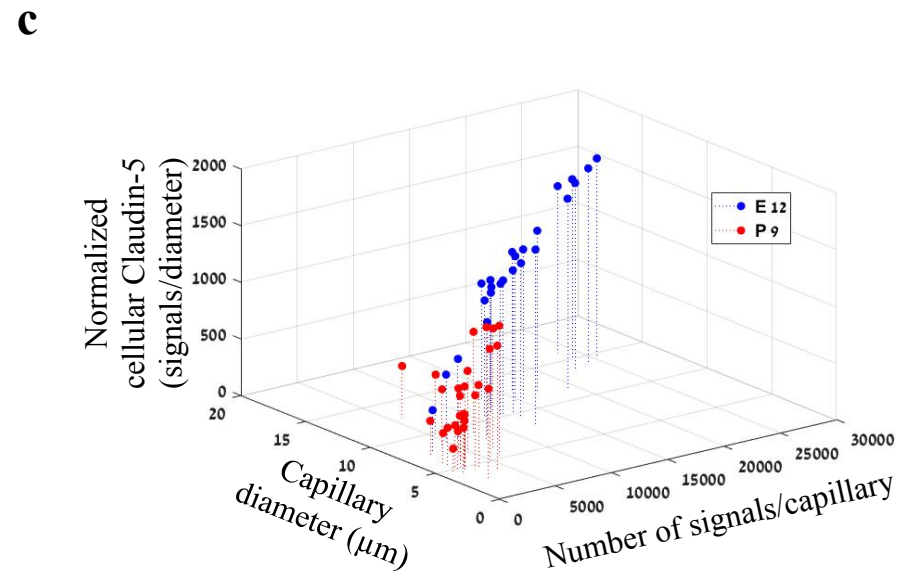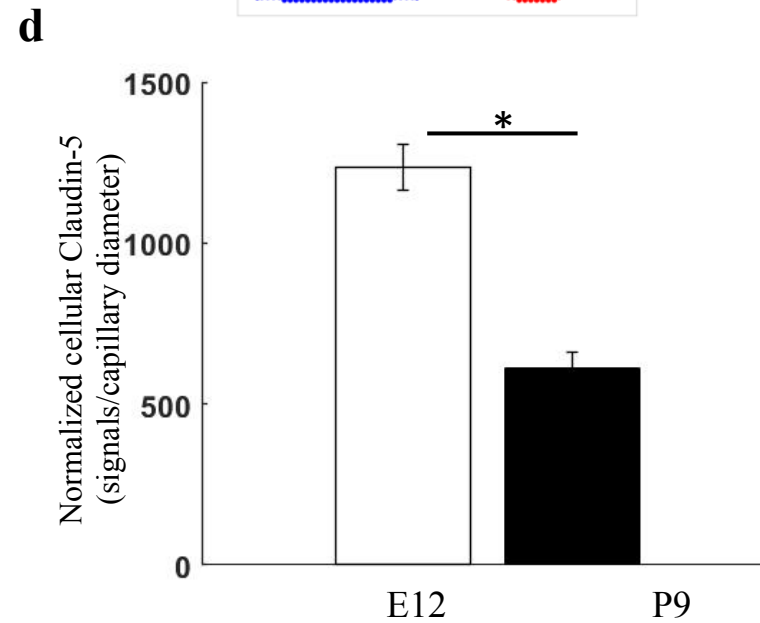

253 **Fig. 5: Total cellular claudin-5 abundance does not correlate with BBB restrictive**  
254 **properties.** Quantifications of claudin-5 levels and clustering properties along developmental  
255 BBB maturation **a**, dSTORM (right) compared to epi-fluorescent images (left) of claudin-5  
256 immunostaining in E12 and P9 cortical capillary cross-sections. Two distinct claudin-5  
257 organizations could be observed; discrete clusters (arrowheads) and a more defused claudin-5  
258 appearance composed of many small clusters with relatively small gaps between them,  
259 evident only in E12 capillaries (arrow, see Extended Data Fig. S1a for further analysis). Scale  
260 bars, 1  $\mu\text{m}$ . **b**, Claudin-5 clustering-properties analysis showed that there were about 2.6 times  
261 more discrete clusters per capillary at E12 than at P9 (a set of 20 capillaries of each age).  
262 Distribution of claudin-5 clusters area in E12 capillaries was skewed towards smaller clusters  
263 and the average cluster area was slightly smaller in E12 with no dramatic difference between  
264 the distributions (average of  $0.309 \mu\text{m}^2$  (E12) vs.  $0.3413 \mu\text{m}^2$  (P9). There was no dramatic  
265 difference in the distribution of signals per cluster or signal densities between the two groups  
266 (see Fig. S1b).  $n=3$  pups/embryos, 20 capillaries, 657 clusters (E12) and 246 clusters (P9).  
267 Data are mean $\pm$ s.e.m. **c**, Quantifications of total cellular claudin-5 per capillary cross section  
268 shows a shift towards lower claudin-5 levels and smaller capillary diameter in P9 than in E12  
269 vasculature. Capillary diameter was significantly smaller ( $5.9\pm 0.39 \mu\text{m}$  (P9),  $11.1\pm 0.47 \mu\text{m}$   
270 (E12)), total number of claudin-5 signals per capillary was significantly lower ( $3,590\pm 372$   
271 (P9),  $14,341\pm 1,257$  (E12)). **d**, Normalizing the total number of signals per capillary to its  
272 diameter shows the average claudin-5 cellular abundance is significantly lower at P9.  $n=25$   
273 capillaries (E12) and 27 capillaries (P9) of 3 embryos/pups. Data are mean $\pm$ s.e.m. \* $P < 0.05$   
274 (Two tailed Mann–Whitney U-test).

275 We then expanded the structural and organizational properties examination to include  
276 additional TJ proteins in cortical capillaries. Imaging ZO1 and occludin showed that like  
277 claudin-5, ZO1 had clustered organization (Fig. 6a left), whereas occludin was much less  
278 organized in discrete clusters and had more dispersed organization patterns (Fig. 6a right).  
279 Based on published biochemical studies, ZO1 is known to physically interact with the C-  
280 terminals of both claudin-5 and occludin, which aligns with our imaging data demonstrating  
281 signals of all three in close proximity (Fig. 6, S3).

282 While each capillary cross-section presented multiple claudin-5 clusters, we assumed that  
283 not all claudin-5 proteins are localized to TJs. Indeed we could detect claudin-5 clusters in  
284 close proximity with a lysosomal marker (LAMP1, Fig. S4a), suggesting lysosome  
285 localization. In addition, we could detect claudin-5 clusters in close proximity with an ER  
286 marker (BiP, Fig. S4b), suggesting ER localization. Therefore we focused on structures where  
287 claudin-5 and ZO1 clusters were coupled (Fig. 6b arrows), reasoning that these might better  
288 reflect actual TJs. We analyzed the density of claudin-5 signals in clusters that were coupled  
289 with ZO1 clusters and compared it to the density of claudin-5 signals in independent clusters  
290 (Fig. 6b, arrowhead) of both E12 and P9 (Fig. 6b,c). The average density of P9 claudin-5  
291 clusters that were coupled with ZO1 clusters was about five-fold higher ( $P < 0.0215$ ) than in  
292 independent claudin-5 clusters. The average density of E12 claudin-5 clusters was similar  
293 regardless of proximity to ZO1 clusters, and was low compared to P9 independent claudin-5  
294 clusters. We concluded that claudin-5 clusters in TJs (based on pairing with ZO1) have higher  
295 claudin-5 density in late developmental stages, a structural feature that correlates with BBB  
296 maturation.

**Figure 6**

**a**

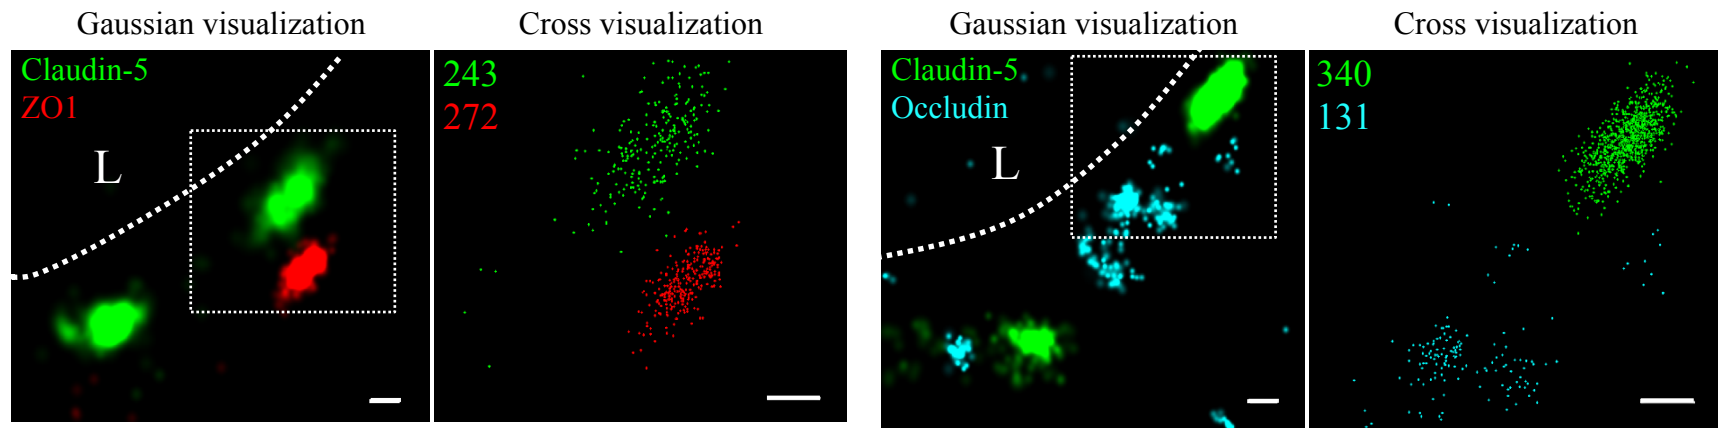

**b**

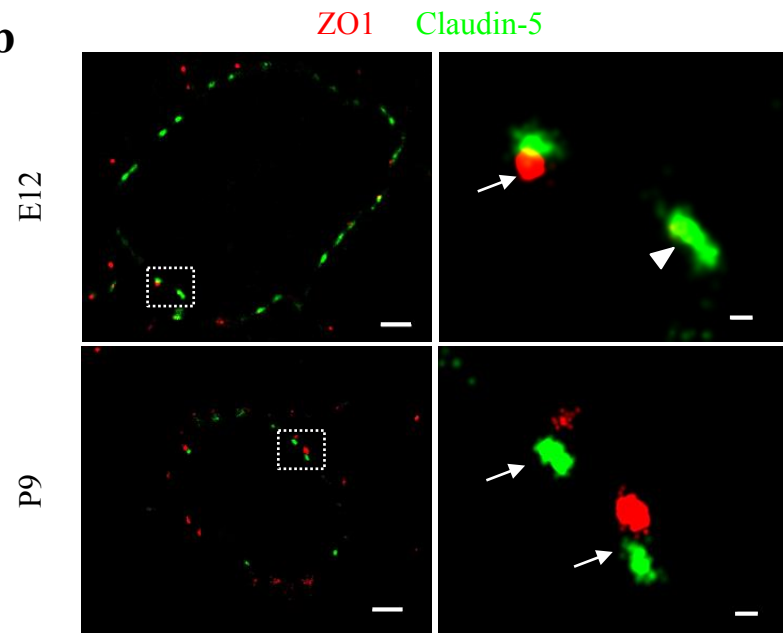

**c**

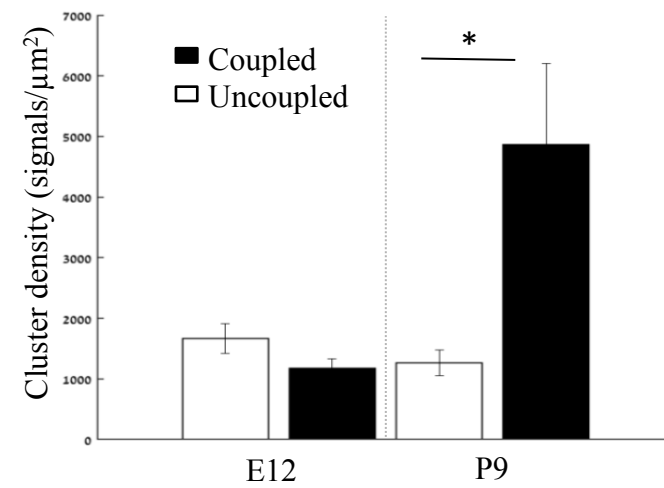

297 **Fig. 6: Molecular organization of mouse cortical BBB TJs.** Nano-scale molecular  
298 organization of TJ proteins in cortical capillaries of postnatal wild-type mice (P9). **a**, Claudin-  
299 5 and ZO1 display clustered organization (left) whereas occludin was much less organized in  
300 discrete clusters and had more dispersed organization patterns (right). 2D-STORM imaging  
301 data demonstrates that signals of all three TJ proteins are in close proximity ('Gaussian  
302 visualization' in which signal intensity correlates with localization precision). An inset with  
303 magnifications of each cluster (right images) demonstrates the very high molecular density of  
304 TJ proteins ('Cross visualization' shows all resolved signals where each single-molecule  
305 signal displays as a cross). Scale bars, 100 nm. Representative signal numbers are shown.  
306  $n=40$  capillaries of 4 wild-type pups. L – capillary lumen. **b**, dSTORM imaging (Gaussian  
307 visualization) of claudin-5 (green) and ZO1 (red) immunostaining of E12 and P9 cortical  
308 capillary cross-sections. Note that some claudin-5 clusters are coupled with ZO1 clusters  
309 (high magnification insets, arrows) while some are independent claudin-5 clusters  
310 (arrowhead). Scale bars, 1  $\mu\text{m}$  and 100 nm in insets. **c**, Average density of P9 claudin-5  
311 clusters that were coupled with ZO1 clusters was  $\sim 5$ -fold higher than independent claudin-5  
312 clusters. The average density of E12 claudin-5 clusters was similar regardless of proximity to  
313 ZO1 clusters, and was low compared to P9 independent claudin-5 clusters.  $n=40$  clusters from  
314 11 capillaries and 43 clusters from 11 capillaries (of 3 embryos/pups, P9 and E12  
315 respectively). Data are mean $\pm$ s.e.m. \* $P < 0.05$  (Two tailed Mann–Whitney U-test).

316 **ZO1 clustering is independent of claudin-5 *in-vivo***

317 In order to gain insights on mechanisms underlying Nano-scale molecular architecture of  
318 BBB TJs, we imaged claudin-5 null and wild-type littermates cortical capillaries with  
319 dSTORM. This approach was intended to enable testing whether claudin-5 being a very  
320 abundant transmembrane TJ component might be an organizer of other TJ components. We  
321 initially confirmed the specificity of claudin-5 antibodies, with no detectable staining in null  
322 tissue (confocal microscopy of E16 cortical null and wild-type littermates' tissues, Fig. 7a).  
323 Specificity was also confirmed with dSTORM imaging (Fig. 7b). Finally, we found that  
324 absence of claudin-5 did not alter, ZO1 clustering organization nor it had any effect on  
325 occludin dispersed organization patterns (Fig 7c). In contrary to the previous conclusions of  
326 unaltered molecular composition of claudin-5 null TJs (Nitta et al., 2003), quantification of  
327 dSTORM imaging revealed that the total cellular occludin levels (normalized to capillary  
328 circumference) were higher in claudin-5 null capillaries by ~1.29 fold compared to occludin  
329 levels in wild-type capillaries ( $P < 0.0039$ , Fig. 7d). Overall cellular ZO1 expression levels  
330 were also higher in claudin-5 null capillaries (not statistically significant). These new findings  
331 of molecular alterations in TJ protein levels in the claudin-5 null BBB demonstrate the high  
332 sensitivity provided by single molecule super resolution imaging, with these molecular  
333 changes most probably obscured when tested by other approaches. We concluded that nano-  
334 scale organization of both ZO1 and occludin are independent of claudin-5 expression (at least  
335 in the embryonic setting). We also believe that these findings warrant a new evaluation of  
336 claudin-5 function at BBB junctions.

**Figure 7**

**a**

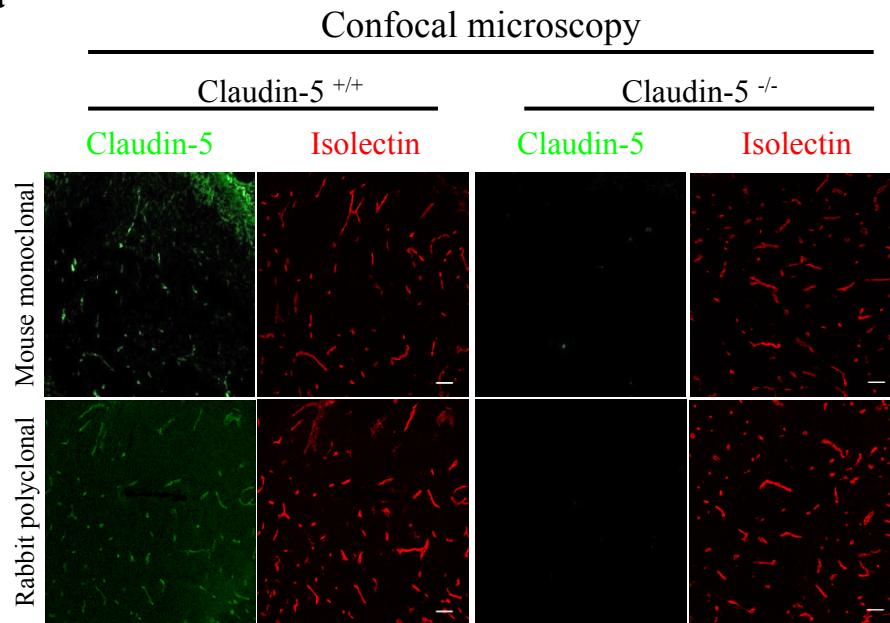

**b**

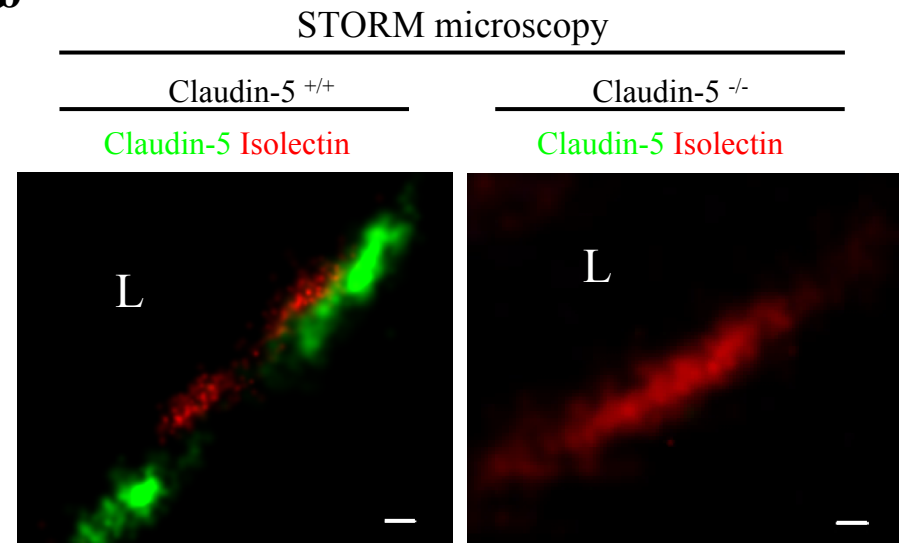

**c**

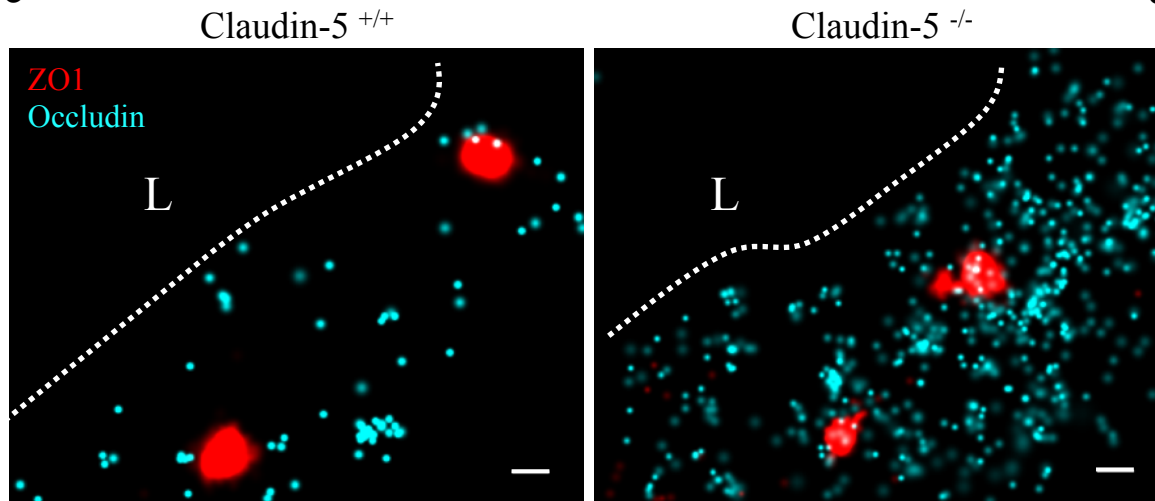

**d**

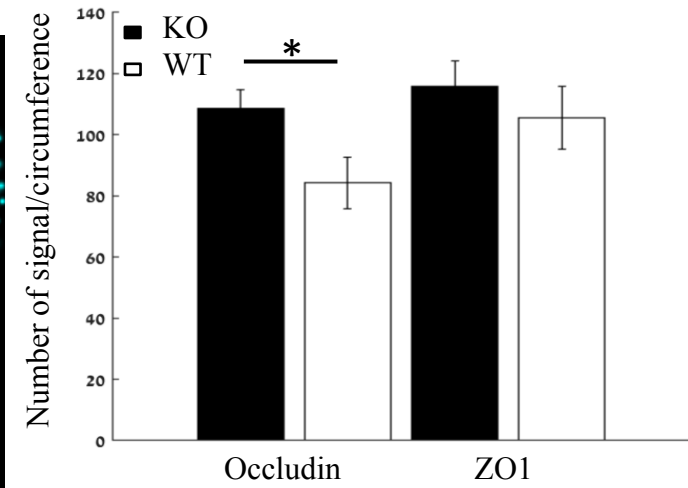

337 **Fig. 7: Nano-scale organization of both ZO1 and occludin are independent of claudin-5**  
338 **expression. a-b**, Claudin-5 antibodies specificity was confirmed by both confocal microscopy  
339 (**a**, Scale bars, 50  $\mu\text{m}$ ) and dSTORM microscopy (**b**, Scale bars, 0.1  $\mu\text{m}$ ), with no detectable  
340 staining in E16 cortical null tissues (Isolectin staining used to localize vasculature,  $n=4$  wild-  
341 type, 4 claudin-5 null embryos). **c**, E16 claudin-5 null and wild-type littermates cortical  
342 capillaries imaged with dSTORM display unaltered ZO1 clustering organization and occludin  
343 dispersed organization patterns. Scale bars, 100 nm. **d**, Total cellular signal quantifications  
344 revealed that occludin levels were  $\sim 1.29$ -fold higher in claudin-5 null capillaries compared to  
345 wild-type. Total cellular ZO1 signal levels were also higher in claudin-5 null capillaries (not  
346 statistically significant). Data are mean $\pm$ s.e.m. \* $P < 0.05$  (Two tailed Mann–Whitney U-test).  
347 L – capillary lumen.  $n=109$  capillaries of 4 wild-type embryos and 86 capillaries of 4 claudin-  
348 5 null embryos.

349

### 350 **Investigating BBB TJ function using super-resolution microscopy**

351 In light of the identified maturation changes in claudin-5 clustering properties, we sought  
352 to directly test TJ function *in vivo*. To this end we employed tracer challenges and compared  
353 TJs permeability at three developmental time points (E12, E16 and P9, Fig. 8). We performed  
354 dSTORM imaging of cortical capillaries following injection of fluorescent tracers to the  
355 blood stream and used claudin-5 immunofluorescence to demarcate capillary boundaries and  
356 localize TJs in cortical tissues. Similar to the traditional HRP/EM approach (Reese &  
357 Karnovsky, 1967), dSTORM imaging enables detection of functional BBB TJs with the  
358 added value of TJ protein visualization and localization relative to tracer molecules. The  
359 HRP/EM approach is not compatible in young embryos and therefore until now, dysfunction  
360 of immature TJs was only speculated to underlie capillary hyper-permeability at early stages  
361 of BBB development. Thus we tested E12 TJ function with an *in utero* embryonic liver tracer



362 injection method that we previously developed to assess BBB permeability during early  
363 mouse developmental stages (Ben-Zvi et al., 2014). As expected from previous experiments  
364 with conventional microscopy (Ben-Zvi et al., 2014), with dSTORM imaging we could  
365 confirm that E12 capillaries did not restrict movement of tracer molecules across the BBB  
366 (Fig. 8a; 10-kDa dextran, upper left. ~443 Dalton sulfo-NHS-biotin, lower left). Tracer  
367 signals could be detected in the basal side or further away, presumably in brain tissue (Fig. 8,  
368 arrowheads). Moreover, we could directly image TJs contribution to this leakage; tracer  
369 signals were found intermingled with claudin-5 clusters (Fig. 8, arrows) and in many cases we  
370 could detect tracer signals in three locations relative to claudin-5 clusters: the luminal side,  
371 the cluster area itself and the abluminal side. We interpreted these as direct evidence of tracer  
372 leakage across immature TJs. As expected, mature P9 capillaries restrict movement of the  
373 vast majority of tracer molecules (Fig. 8; 10-kDa dextran, upper right. ~443 Dalton sulfo-  
374 NHS-biotin, lower right) from the lumen to the basal side (similar results were obtained using  
375 Biocytin, data not shown).

376 In order to examine TJ function along the developmental axis, we also imaged E16 TJs.  
377 First, we validated that at E16 cortical TJs were indeed restrictive to the 10-kDa tracers  
378 (aligned with general permeability that we previously demonstrated (Ben-Zvi et al., 2014)).  
379 TJs at this stage were functional and prevented tracer leakage across claudin-5 clusters (Fig.  
380 8a, middle-upper). Surprisingly, the smaller tracer, sulfo-NHS-biotin, was not restricted to the  
381 vessels' lumen, and was evident also on the brain side (Fig. 8a middle-lower, arrowheads).  
382 Therefore at this stage TJs were not as mature as P9 TJs and did not prevent smaller tracer  
383 leakage across claudin-5 clusters. These developmental changes in permeability are reflected  
384 in quantification of tracer signal density at the abluminal side of the junctions (Fig. 8b,c). We  
385 conclude that BBB TJs might have different maturation time courses for different size

386 selectivity properties and that the dSTORM approach is suitable for in depth investigations of  
387 this phenomena in future studies.



388 **Fig. 8: Investigating BBB TJ function using super-resolution microscopy.** Tracer  
389 challenges testing cortical capillaries permeability with dSTORM imaging, provides evidence  
390 of leakage across immature TJs. **a**, E12 TJ function tested with an *in utero* embryonic liver  
391 tracer injection method (Ben-Zvi et al., 2014). 10 kDa dextran signals (upper-left) and ~443  
392 Dalton sulfo-NHS-biotin signals (lower-left) were found in the luminal side, intermingling  
393 with claudin-5 clusters (arrows) and in the abluminal side and further away (presumably brain  
394 tissue, arrowheads). These were interpreted as evidence of tracer leakage across immature  
395 TJs. Following trans-cardiac tracer challenges, dSTORM imaging shows P9 capillaries can  
396 restrict movement of tracer molecules from the lumen to the brain side (10 kDa dextran  
397 upper-right, and ~443 Dalton sulfo-NHS-biotin lower-right). E16 cortical capillaries were  
398 previously found to prevent leakage of 10-kDa tracers (Ben-Zvi et al., 2014; Licht, Dor-  
399 Wollman, Ben-Zvi, Rothe, & Keshet, 2015), also validated here with dSTORM imaging  
400 (middle-upper). Surprisingly, at this stage sulfo-NHS-biotin was not restricted to the vessels'  
401 lumen, evident also on the brain side (middle-lower arrowheads) and intermingling with  
402 claudin-5 clusters (arrows). Scale bars, 100 nm. L – capillary lumen. *n*=40 capillaries for each  
403 tracer of 3 pups/embryos. **b-c**, Developmental changes in permeability are reflected in  
404 quantification of tracer signal density at the abluminal side of the junctions (10 kDa dextran at  
405 b, and 443 Dalton sulfo-NHS-biotin at c). Relative leakage index was calculated as tracer  
406 signal density (signals/area) in a fixed area and distance from the abluminal side of the  
407 claudin-5 signal, and was normalized to the average signal density at P9 (set as leakage  
408 index=1). *n*=10 capillaries for each tracer of 3 pups/embryos, \**P*<0.0123, \*\**P*<0.0031  
409 , \*\*\**P*<0.0006, \*\*\*\**P*<0.0001, Kruskal-Wallis test and Dunn's test for multiple comparisons.

## 410 **Discussion**

411 We present here a new super resolution imaging approach for BBB research. Using this  
412 approach we revealed novel structural and functional features of BBB TJs through  
413 examination of TJ maturation of EC cultures, normal cortical mouse BBB development and  
414 claudin-5 null embryos. With super-resolution imaging we could overcome the limitations of  
415 conventional microscopy, which is essential for BBB TJ investigations since it provides  
416 proper spatial resolution and enables sensitive quantifications of TJ proteins and tracer  
417 molecules.

418 We provide direct evidence of non-functional TJs in the early embryonic BBB. HRP-EM  
419 approaches were not useful for studying early embryonic stages; consequently direct evidence  
420 for the cellular pathway mediating leakage in early embryogenesis was missing. A recent  
421 mouse retina-vasculature study showed that developmentally, the TJ pathway is already  
422 restrictive before the vesicular pathway is blocked (Chow & Gu, 2017) and studies in sheep  
423 demonstrated similar trends in the brain (Dziegielewska et al., 1979). We suggest that in  
424 mouse cortical vasculature, the course of barrier-genesis might be different. We found that  
425 there are different TJ maturation developmental time-courses for different size selectivities.  
426 Thus, even in later stages (E16), when vesicular activity is clearly diminished at the BBB  
427 (based on ultra-structural EM studies (Bauer et al., 1993)), we found that TJs were not fully  
428 mature and mediate leakage of a low molecular-weight tracer.

429 We focused on three major TJs components and found sparse occluding vs. clustered  
430 ZO1/claudin-5 molecular architecture. Since our current study did not include additional TJ  
431 components, we could not differentiate in our analyses between subtypes of TJs and therefore  
432 these might represent claudin-5 presumably localized to either bicellular or tricellular  
433 junctions.

434 TJ claudin-5 shifted into denser cluster organization along with *in vivo* BBB maturation,  
435 a finding which is in line with freeze-fracture EM data that suggested cluster organization of  
436 EC TJs (Haseloff et al., 2015; Morita et al., 1999). Therefore, we suggest that confocal  
437 imaging description of claudin-5 strands might be a misrepresentation of actual claudin-5  
438 organization. Notably, dSTORM might give rise to some artificial clustering due to antibody  
439 staining and fluorophore overcounting (Burgert, Letschert, Doose, & Sauer, 2015). Hence,  
440 our clustering results of claudin-5 and ZO1 should be taken as relative changes in protein  
441 organization under the different tested conditions. In addition, our imaging included multiple  
442 stains (two different antibodies used for claudin-5 and testing several different fluorophores  
443 conjugated to secondary antibody combinations, all resulted in similar clustering data).  
444 Moreover, occludin did not show similar clustering properties and finally, we used algorithms  
445 to minimize fluorophore overcounting (see Methods (Ovesny, Krizek, Borkovec, Svindrych,  
446 & Hagen, 2014)).

447 Previous TJ studies primarily investigated epithelial cells, which have considerably larger  
448 volumes than ECs. These studies emphasized a contentious organization of transmembrane  
449 proteins along the apical circumference of the cells, providing ‘sealing belts’. Our finding of  
450 disrupted lines with discrete clusters, forming bead-like structures does not support the  
451 concept that claudin-5 fully construct these ‘sealing belts’. We can think of three possible  
452 explanations for this discrepancy; first, we cannot exclude that our staining approach  
453 underrepresents the entire claudin-5 localizations (highly compacted foci might reduce  
454 antibodies accessibility). Second, TJ cleft directionality is variable especially *in vivo* and the  
455 3D organization of the ‘sealing belt’ might be missed once imaged in 2D. This explanation is  
456 incomplete especially once examining the *in vitro* data where very flat coordinated orientation  
457 monolayers are imaged at the cell-glass contacts. Third and most exciting possibility is that  
458 other TJ proteins (yet to be discovered) occupy the gaps between claudin-5 clusters; these

459 might be coordinately localized to complete the ‘sealing belts’. Such theory aligns with the  
460 findings that the claudin-5 null BBB has only partially perturbed sealing properties (Nitta et  
461 al., 2003).

462 Our data supports the huge cellular claudin-5 abundance reported by other approaches  
463 (e.g average of ~12,000 transcripts per capillary endothelial cell (Vanlandewijck et al., 2018),  
464 average of ~14,000 (E12) or ~3500 (P9) signals per cross section in our data). Total levels of  
465 junctional proteins/transcripts are presented in many studies (measured by western blot,  
466 conventional imaging, qPCR/RNAseq etc. (Armulik et al., 2010; Daneman et al., 2010; Nitta  
467 et al., 2003; Vanlandewijck et al., 2018; Y. Zhang et al., 2014)), and down regulation of these  
468 components are often used as an indicator for TJ dysfunction (Alvarez et al., 2011; Bell et al.,  
469 2010; Bell et al., 2012; Zhong et al., 2008). Our findings that claudin-5 expression inversely  
470 correlates with BBB tightness in the developmental setting might be distinct from the  
471 situation in the adult BBB. Similar to our findings, dSTORM imaging of cultured alveolar  
472 epithelial cell TJs, shows increase claudin-5 in response to alcohol exposure together with an  
473 increase in paracellular leak (Schlingmann et al., 2016). In pathological settings a minimal  
474 threshold of claudin-5 expression might result in TJ leakage. Thus, it will be interesting to test  
475 if such a threshold is breached in disease (as suggested for the 22q11 syndrome (Greene et al.,  
476 2018)).

477 The differential size selectivity we found in E16 was reminiscent of the seminal study by  
478 Nitta *et al.* (Nitta et al., 2003) demonstrating that the BBB of E18.5 claudin-5 null mouse  
479 embryos was hyper-permeable to Hoechst (562 Dalton) and to gadolinium (~742 D) but not to  
480 10 KDa dextran or to endogenous albumin (~66 KDa). Following this study, claudin-5 was  
481 considered the molecular component of BBB TJs responsible for restricting passage of low  
482 molecular weight substances (<800 D). Our data indicates that despite the presence of  
483 claudin-5, TJs of E16 wild-type mice display similar differential size selectivity as E18.5

484 claudin-5 null TJs. Accordingly it seems that claudin-5 is not the sole component responsible  
485 for restricting passage of low molecular weight substances.

486 Further investigations are needed in order to evaluate the possible redundancy between  
487 different BBB TJ proteins. The increase in occludin expression we describe for claudin-5 null  
488 TJ could reflect a developmental compensatory mechanism that might obscure the full  
489 contribution of claudin-5 to TJ function. Nitta *et al.* also suggested that in the absence of  
490 claudin-5, claudin-12-based TJs in brain vessels would function as a molecular sieve  
491 restricting high molecular weight substances but allowing low molecular weight substances  
492 (<800 kDa) to leak into the brain. Recent RNAseq data indicated low expression of claudin-  
493 12 in BBB endothelium (approximately 80 fold lower than claudin-5 (Vanlandewijck *et al.*,  
494 2018; Y. Zhang *et al.*, 2014)), reports further corroborated by a claudin-12 reporter mouse  
495 study indicating expression in many other CNS cell types (Castro Dias *et al.*, 2019).

496 Our findings of unchanged cluster organization of ZO1 in the absence of claudin-5 might  
497 be explained by interaction of ZO1 with other TJ proteins (other than occludin which is not  
498 clustered) or by recent reports of ZO1 capability of self-organization into membrane-attached  
499 compartments via phase separation that can drive TJ formation in epithelia cells (Beutel,  
500 Maraspini, Pombo-Garcia, Martin-Lemaitre, & Honigmann, 2019). It also aligns with  
501 claudin-5 null embryos having no overt morphological abnormalities (Nitta *et al.*, 2003). The  
502 other two ZO proteins might also participate in formatting TJ architecture. Based on  
503 scRNAseq data, ZO3 is not expressed at the BBB but ZO2 has lower but significant mRNA  
504 levels (Vanlandewijck *et al.*, 2018). It would be interesting to explore ZO2 nano-scale  
505 organization as it shares the same self-organization capacity as ZO1 and therefore might  
506 display similar clustering properties (Beutel *et al.*, 2019).

507 Further development of the BBB dSTORM approach will provide additional insights: the  
508 ability to image proteins together with membrane lipids and 3D reconstruction of super-



509 resolution imaging are both important focus points for future studies. Deciphering BBB TJ  
510 biology with this new approach will aid in evaluating the potential of TJ manipulation for  
511 drug delivery and in identifying TJ abnormalities in disease.

512

## 513 **Methods**

514 **Animals.** ICR (CD-1®, Envigo, Rehovot, Israel) mice were used for embryonic and post-  
515 natal BBB functionality assays and dSTORM imaging. Pregnant mice were obtained  
516 following overnight mating (day of vaginal plug is defined as embryonic day 0.5). All  
517 animals were housed in SPF conditions and treated according to institutional guidelines  
518 approved by the Institutional Animal Care and Use Committee (IACUC) at Hebrew  
519 University.

520 The claudin-5 mutant mice (Nitta et al., 2003) were kindly provided by Dr. Mikio Furuse  
521 (National Institute for Physiological Sciences, Japan). Mice were housed in individually  
522 ventilated cages under specific pathogen-free conditions at 22 °C with free access to chow and  
523 water. E16 claudin-5 wild-type and null embryos were obtained according to procedures  
524 approved by the Veterinary Office of the Canton Bern, Switzerland. Claudin-5 null mutant  
525 and wild-type embryos were genotyped using lysates prepared from tips of tails using the  
526 following 3 PCR primers: Cldn5\_UPS: GCCCCTACTAGGACAGAAACTGGTAG;  
527 Cldn5\_REV1: CAGACCCAGAATTTCCAACGCTGC and PGK-pA-FW1:  
528 GCCTGCTCTTTACTGAAGGCTCTT, which provide a 422 bp product for the claudin-5  
529 wild-type allele and a 630 bp product for the claudin-5-knockout allele. PCR cycling  
530 conditions were: 4 min. 94°C; 1 min. each at 94°C, 64°C and 72°C; repeated 35 times and a  
531 final 5 min elongation step at 72°C.

532 **Tissue preparation.** After dissection, brains were placed in 4% paraformaldehyde (PFA,  
533 Sigma Aldrich) at 4°C overnight, cryopreserved in 30% sucrose and frozen in TissueTek

534 OCT (Sakura). Frozen brains were cut to 5-8  $\mu$ m slices for immunofluorescent staining  
535 (CM1950, Leica) to produce coronal brain sections.

536 **Immunohistochemistry.** Tissue sections or cell cultures were blocked with 20% goat serum  
537 and 20% horse serum, permeabilized with 0.5% Triton X-100, and stained with primary and  
538 secondary antibodies (see antibodies table for details). Sample were mounted with freshly  
539 made imaging buffer for dSTORM (describe in the dSTORM imaging section) and visualized  
540 by dSTORM and epifluorescence, or mounted in Fluoromount G (EMS) and visualized by  
541 confocal microscopy. Both a polyclonal and a monoclonal anti-claudin-5 antibody were found  
542 to be highly specific in dSTORM, validated with claudin-5 null mice staining, as in confocal  
543 imaging (Fig. 7a,b).

| Epitope      | Class      | Host              | Catalogue number    | Company                   | Dilution |
|--------------|------------|-------------------|---------------------|---------------------------|----------|
| * Claudin 5  | Monoclonal | Mouse             | 35-2500             | Life Technologies         | 1:100    |
| ** Claudin 5 | Polyclonal | Rabbit            | 1600 34             | Zymed                     | 1:50     |
| ZO1/TJP1     | Polyclonal | Rabbit            | 61-7300             | Thermo Fisher Scientific  | 1:200    |
| Occludin     | Monoclonal | Mouse             | 33-1500             | Thermo Fisher Scientific  | 1:50     |
| ERG          | Monoclonal | Rabbit monoclonal | ab92513/<br>EPR3864 | abcam                     | 1:200    |
| Lamp1        | Monoclonal | Rat               | ID4B                | DSHB/<br>AB 528127        | 1:200    |
| BiP          | Monoclonal | Rabbit            | C50B12<br>#3177     | Cell Signaling Technology | 1:100    |
| GAPDH        | Monoclonal | Rabbit            | ab181602            | abcam                     | 1:400    |

544

545

546

547

| Fluorophore                  | Isotype         | Catalogue number | Company           | Dilution |
|------------------------------|-----------------|------------------|-------------------|----------|
| Alexa fluor®647              | Anti-rabbit IgG | 711-605-152      | Jackson           | 1:1000   |
| Alexa fluor®647              | Anti-mouse IgG  | 711-605-151      | Jackson           | 1:1000   |
| Alexa fluor®568              | Anti-rabbit IgG | A11011           | Life Technologies | 1:1000   |
| Alexa fluor®568              | Anti-mouse IgG  | A1103-1          | Life Technologies | 1:1000   |
| Alexa fluor®488              | Anti-mouse IgG  | 715-545-151      | Jackson           | 1:1000   |
| Streptavidin Alexa fluor®647 | Biotin          | S32357           | Molecular Probes  | 1:800    |
| Alexa fluor®647              | Anti-rat IgG    | 712-605-153      | Jackson           | 1:1000   |

548

549 **Embryonic BBB permeability assay.** We used the method we developed and fully described  
550 in our previous publication (Ben-Zvi et al., 2014). In brief, dams were deeply anesthetized  
551 with ketamine-xylazine i.p. (8.5 mg/ml ketamine, 1.5 mg/ml xylazine, in 100 µl saline).  
552 Embryos were injected with 5 µl of Dextran, Alexa Fluor®647 anionic fixable (D22914,  
553 Molecular Probes, 2 mg/ml) or 5 µl of EZ-Link™ Sulfo-NHS-Biotin (21217, Thermo Fisher  
554 Scientific, 1 µg/20 µl), while still attached via the umbilical cord to the mother's blood  
555 circulation. Taking advantage of the sinusoidal, fenestrated and highly permeable liver  
556 vasculature, dye was injected using a Hamilton syringe into the embryonic liver and was  
557 taken up into the circulation in a matter of seconds. After 5 min of circulation, embryonic  
558 heads were fixed by 4 hours immersion in 4% PFA at 4°C, cryopreserved in 30% sucrose and  
559 frozen in TissueTek OCT (Sakura).

560 **Postnatal BBB permeability assay.** P9 pups were deeply anaesthetized and 10 µl of Dextran,  
561 Alexa Fluor®647 anionic fixable (D22914, Molecular Probes, 2 mg/ml) or EZ-Link™ Sulfo-  
562 NHS-Biotin (21217, Thermo Fisher Scientific, 1 µg/20 µl), were injected into the left  
563 ventricle with a Hamilton syringe. After 5 min of circulation, brains were dissected and fixed  
564 by immersion in 4% PFA at 4°C overnight, cryopreserved in 30% sucrose and frozen in

565 TissueTek OCT (Sakura).

566 **Cell culture.** The mouse brain endothelioma cell line (bEnd.3) was purchased from American  
567 Type Culture Collection (Manassas, VA, USA). bEnd.3 cells were cultured with Dulbecco's  
568 Modified Eagle's medium high glucose (DMEM), supplemented with 10% fetal bovine serum  
569 and 1% penicillin-streptomycin solution (Biological Industries, Beit HaEmek, Israel). Cells  
570 were incubated at 37°C in a humid atmosphere in the presence of 5% CO<sub>2</sub>. Cells at passages  
571 26-27 were suspended (0.25% Trypsin EDTA B, Biological Industries) and seeded on 24 mm  
572 precision coverslips (no. 1.5H, Marienfeld-superior, Lauda-Königshofen, Germany). Cells  
573 were washed with PBS and fixed with 4% PFA (at indicated time point; up to 7 days or more  
574 than 11 days post-confluence).

575 **iPSC differentiation to brain microvascular endothelial-like cells (iBMECs).** iPSCs from  
576 a healthy individual (BGUi012-A) (Falik et al., 2020) were cultured between passages 10-17,  
577 seeded on Matrigel (Corning) with daily replacement of NutriStem medium (Biological  
578 Industries) as previously described ((Falik et al., 2020), PMID: 32905996). iPSCs were  
579 passaged every 6-7 days with Versene (Life Technologies) at a 1:12 ratio. Differentiation into  
580 iBMECs was carried out as previously described (Jagadeesan, Workman, Herland, Svendsen,  
581 & Vatine, 2020; Vatine et al., 2017; Vatine et al., 2019); cells were passaged and cultured for  
582 2–3 days until reaching a density of 2-3x10<sup>5</sup> cells/well. Next, medium was replaced with  
583 unconditioned medium without bFGF [UM/F: 200 mL of DMEM/F12 (1:1) (Gibco), 50 mL  
584 knock-out serum replacement (Gibco), 2.5 mL non-essential amino acids (Gibco), 1.25 mL of  
585 gluta-max (Gibco), 3.8 uL of β-mercapto-ethanol (Sigma), and 2.5 mL PSA (BI)] and  
586 changed daily for six days. Medium was then replaced with human endothelial serum-free  
587 medium (hESFM, Life Technologies) supplemented with 20 ng/mL bFGF and 10 mM All-  
588 trans retinoic acid (RA) (Sigma) (Biomedical Technologies, Inc.) for 2 days. Cells were then  
589 gently dissociated into single cells with Accutase (StemPro) and plated in hESFM medium at

590 a density of  $1 \times 10^6$  cells on transwells (0.4  $\mu\text{m}$  pore size; Corning), coverslips or petri dishes  
591 that were pre-coated with a mixture of collagen IV (400  $\mu\text{g}/\text{mL}$ ; Sigma) and fibronectin (100  
592  $\mu\text{g}/\text{mL}$ ; Sigma).

593 **TEER measurements.** Trans-endothelial electrical resistance (TEER) was measured every  
594 24 h following iBMEC seeding. Resistance was recorded using an EVOM ohmmeter with  
595 STX2 electrodes (World Precision Instruments). TEER values were presented as  $\Omega \times \text{cm}^2$   
596 following the subtraction of an empty transwell and multiplication by 1.12  $\text{cm}^2$  to account for  
597 the surface area. TEER measurements were measured three independent times for each  
598 sample and at least twice for each experimental condition.

599 **Paracellular permeability measurements.** Sodium fluorescein (10 mM) was added to the  
600 upper chamber of the Transwells. Aliquots (100  $\mu\text{l}$ ) were collected from the bottom chamber  
601 every 15 min and replaced with fresh medium. Fluorescence (485 nm excitation and 530 nm  
602 emission) was quantified at the end of the experiment with a plate reader. Rate of tracer  
603 accumulation was used to calculate Pe values as previously described (Vatine et al.,  
604 2017). Monolayer fidelity was confirmed at the beginning and at the end of each experiment  
605 by TEER measurements.

606 **iBMECs STORM imaging.** iBMECs were seeded on 24 mm precision coverslips (no. 1.5H,  
607 Marienfeld-Superior, Lauda-Königshofen, Germany), pre-coated with a mixture of collagen  
608 IV (400  $\mu\text{g}/\text{mL}$ ; Sigma) and fibronectin (100  $\mu\text{g}/\text{mL}$ ; Sigma). Cultures were fixed in 4%  
609 paraformaldehyde for 20 min at room temperature (RT), washed three times with PBS and  
610 kept in  $4^\circ\text{C}$  until processing.

611 **Western blot analysis.** Whole cell extracts were isolated using RIPA buffer (50 mM Tris pH  
612 7.4, 150 mM NaCl, 5 mM EDTA pH 8.0, and 1% Nonidet-P40) supplemented with protease  
613 inhibitors (Roche). The concentration of the isolated proteins was determined using Bradford

614 reagent (Sigma). 30-50 micrograms of the protein were separated on a 15% polyacrylamide  
615 gel and electrophoretically transferred to PVDF membranes (Millipore). Membranes  
616 incubated with the primary antibodies against claudin-5 (1:1000 ,Zymed 1600-34) or GAPDH  
617 (1:400, ab181602, ABCAM)) and the appropriate secondary antibodies.

618 **dSTORM imaging.** We used a dSTORM system, which allows imaging at approximately 20  
619 nm resolution by using photo-switchable fluorophores (all dSTORM imaging was done on  
620 TIRF mode). 5  $\mu$ m brain slices were mounted on poly-D-lysine coated coverslips (no. 1.5H,  
621 Marienfeld-superior, Lauda-Königshofen, Germany). dSTORM imaging was performed in a  
622 freshly prepared imaging buffer containing 50 mM Tris (pH 8.0), 10 mM NaCl and 10%  
623 (w/v) glucose with an oxygen-scavenging GLOX solution (0.5 mg/ml glucose oxidase  
624 (Sigma-Aldrich), 40  $\mu$ g/ml catalase (Sigma-Aldrich), 10 mM cysteamine MEA (Sigma-  
625 Aldrich) and 1%  $\beta$  mercaptoethanol (Barna et al., 2016; Dempsey, Vaughan, Chen, Bates, &  
626 Zhuang, 2011; J. Zhang, Carver, Choveau, & Shapiro, 2016). A Nikon Ti-E inverted  
627 microscope was used. The N-STORM Nikon system was built on TIRF illumination using a  
628 1.49 NA X100 oil immersion objective and an ANDOR DU-897 camera. 488, 568 and 647  
629 nm laser lines were used for activation with cycle repeat of ~8000 cycles for each channel.  
630 Nikon NIS Element software was used for acquisition and analysis; analysis was also  
631 performed by ThunderSTORM (NIH ImageJ (Ovesny et al., 2014)). Images in 2D were  
632 Gaussian fit of each localization; in the N-STORM software.

633 **dSTORM quantifications.** The dSTORM approach we used is based on labeling the target  
634 protein with a primary antibody and then using a secondary antibody conjugated to a  
635 fluorophore. Thus resolved signals represent a location that is approximately 40 nm from the  
636 actual epitope (assuming the approximation of the two antibodies' length in a linear  
637 conformation). The number of signals represents an amplification of the actual target  
638 numbers. Amplification corresponds to the primary antibody in the case of a polyclonal

639 antibody (assuming binding to several epitopes in the same protein, which could be reduced  
640 by the use of monoclonal antibodies). Amplification also corresponds to several secondary  
641 antibodies binding to a single primary antibody and to several fluorophores attached to a  
642 single secondary antibody. Nevertheless, resolution of approximately 20 nm allows us to  
643 separate signals and to use these as proxies to the abundance of target molecules, which can  
644 reliably be used to compare different states.

645 *Cellular expression level quantifications:* We defined the capillary cross-section as an  
646 endothelial unit and quantified claudin-5 signals within capillary cross-sections as proxy to  
647 total cellular claudin-5 expression levels.

648 *Cluster area, signal numbers and signal densities:* Single molecule localization microscopy  
649 (SMLM) results in point patterns having specific coordinates of individual detected  
650 molecules. These coordinates are typically summarized in a 'molecular list' (provided by  
651 ThunderSTORM analysis (NIH ImageJ) (Ovesny et al., 2014)). In order to define molecular  
652 clusters, we analyzed the molecular lists through a custom Matlab code (MathWorks) using  
653 the Matlab functions "Cluster" and "Linkage", as follows: First, our code calculated distances  
654 between each point and all other points in the point pattern of the SMLM image. Then, we set  
655 a distance threshold for defining molecules that belong to the same cluster: two points were  
656 defined to be clustered if their distance was smaller than the threshold distance (e.g. 70 nm).  
657 All points that were clustered with a specific point belong to one cluster (as defined by  
658 linkage function). Hence, a point could only be within one cluster. The code then defined and  
659 saved the properties of each cluster, such as the area of the cluster, the number of points  
660 within the cluster, and the number of clusters. Cluster densities were calculated as number of  
661 points divided by each cluster area. Finally, the point patterns were visualized, while showing  
662 all points that belong to the same cluster with the same identifying color (Fig. 1c, S1). The 70  
663 nm threshold distance used for quantifications was determined based on the following

664 parameters: minimal distance could not be below 40 nm (see above antibody labeling  
665 strategy); BBB TJs covering continuous contact points, as we evaluated in published TEM  
666 imaging data, range approximately up to 100 nm; simulation of claudin-5 density in clusters,  
667 measured in different threshold distances between 50-100 nm did not yield significant  
668 differences (Fig. S3).

669 **Confocal imaging.** Images were captured using Nikon Eclipse Ni confocal microscope,  
670 objective X20 with Nikon C2 camera and Nis-Elements software. Images are maximal z-  
671 projection of optical sections taken from a 12 $\mu$ m tissue section imaged with 0.85  $\mu$ m  
672 intervals.

673 **Epi-Fluorescence microscopy.** Images presented in Figures 1a, 4a, were taken using an  
674 Olympus BX51, 10X/0.3 and 20X/0.5, with Andor Zyla camera, and Nikon NIS elements  
675 software (version D4.5) for both image acquisition and analysis.

676 **Statistical analysis.** All comparisons were performed by two-tailed Mann–Whitney U-tests,  
677 or by two tailed pair t- test (as indicated in the figure legends),  $P < 0.05$  was considered  
678 significant (GraphPad Prism 8.0.1(244) for Windows, GraphPad Software, San diego,  
679 California, USA). For multiple comparisons of leakage index (Figure 8), the Kruskal-Wallis  
680 test and Dunn's tests for multiple comparisons were used. For the comparison between post  
681 confluence and super confluence we used cluster densities across experiments, for the  
682 comparison between ZO1 paired and unpaired claudin-5 clusters we used cluster densities  
683 across experiments, for comparisons related to capillaries diameter and total claudin-5 levels  
684 we used capillaries across experiments and for comparisons of total occludin levels in wild-  
685 type and caludin-5 null embryos we used capillaries across experiments (for exact repetitions  
686 see figure legends). Sample size for all immunofluorescence experiments was determined  
687 empirically using standards generally employed by the field: a minimum of three animals per  
688 group in each experiment, a minimum of four tissue sections of each tissue and a minimum of



689 10 capillaries per group. In the data set of claudin-5 null and control littermates, the person  
690 collecting the data and analyzing was blind to the animal's genotype.

## 691 **Acknowledgments**

692 We would like to thank; Mss. Sivan Gelb, Kian Atamny and Victoria Miller of the Ben-  
693 Zvi group for scientific and writing inputs, Drs. Avihu Klar and Danny Ben-Zvi for scientific  
694 inputs, Dr. Gillian Kay for valuable scientific editing, Dr. Norman Grover for his helpful  
695 advice regarding statistical analyses, and Ms. Yaara Arad for help with data presentation. This  
696 study was supported by the Leona M. and Harry B. Helmsley Charitable Trust (2015PG-  
697 ISL007); and the Israel Science Foundation (grants 1882/16 and 2402/16) to ABZ, the Swiss  
698 National Science Foundation (grant 1890809) to BE and the Israel Science Foundation (grant  
699 1621/18) and the Ministry of Science and Technology, Israel (grant 3-15647) to GDV.

700 We wish to dedicate this work to the memory of Prof. Morris J. Karnovsky of Harvard  
701 Medical School, a scientific giant and pioneer of the BBB research field. We are grateful for  
702 his mentorship and scientific support, and especially for encouraging us to pursue our  
703 endeavor of super resolution imaging of BBB TJs.

## 704 **Contribution**

705 ESa performed the majority of the experiments together with RD, SA, BB, MZ and UD.  
706 ABZ and ESa conceived the project and designed the experimental plan. ESa, SA and ABZ  
707 wrote this manuscript, with BE, RD, OY, ESh, GDV and BB, reviewing and contributing to  
708 writing. OY wrote custom Matlab codes for dSTORM analyses; ESh provided critical  
709 scientific guidance for dSTORM imaging and analyses. UD and BE supported claudin-5 null  
710 mouse strain experiments. MZ and GV preformed iBMEC experiments. RD supported the  
711 development of imaging methods and the establishment of the dSTORM imaging system.

## 712 **Ethics declarations**

713 Competing interests

714 The authors declare no competing interests.  
715

## 716 References

- 717 Alvarez, J. I., Dodelet-Devillers, A., Kebir, H., Ifergan, I., Fabre, P. J., Terouz, S., . . . Prat, A.  
718 (2011). The Hedgehog pathway promotes blood-brain barrier integrity and CNS  
719 immune quiescence. *Science*, *334*(6063), 1727-1731. doi:10.1126/science.1206936
- 720 Armulik, A., Genove, G., Mae, M., Nisancioglu, M. H., Wallgard, E., Niaudet, C., . . .  
721 Betsholtz, C. (2010). Pericytes regulate the blood-brain barrier. *Nature*, *468*(7323),  
722 557-561. doi:10.1038/nature09522
- 723 Barna, L., Dudok, B., Miczan, V., Horvath, A., Laszlo, Z. I., & Katona, I. (2016). Correlated  
724 confocal and super-resolution imaging by VividSTORM. *Nat Protoc*, *11*(1), 163-183.  
725 doi:10.1038/nprot.2016.002
- 726 Bauer, H. C., Bauer, H., Lametschwandtner, A., Amberger, A., Ruiz, P., & Steiner, M.  
727 (1993). Neovascularization and the appearance of morphological characteristics of the  
728 blood-brain barrier in the embryonic mouse central nervous system. *Brain Res Dev*  
729 *Brain Res*, *75*(2), 269-278. doi:10.1016/0165-3806(93)90031-5
- 730 Bauer, H. C., Krizbai, I. A., Bauer, H., & Traweger, A. (2014). "You Shall Not Pass"-tight  
731 junctions of the blood brain barrier. *Front Neurosci*, *8*, 392.
- 732 Bell, R. D., Winkler, E. A., Sagare, A. P., Singh, I., LaRue, B., Deane, R., & Zlokovic, B. V.  
733 (2010). Pericytes control key neurovascular functions and neuronal phenotype in the  
734 adult brain and during brain aging. *Neuron*, *68*(3), 409-427.
- 735 Bell, R. D., Winkler, E. A., Singh, I., Sagare, A. P., Deane, R., Wu, Z., . . . Zlokovic, B. V.  
736 (2012). Apolipoprotein E controls cerebrovascular integrity via cyclophilin A. *Nature*,  
737 *485*(7399), 512-516.
- 738 Ben-Zvi, A., Lacoste, B., Kur, E., Andreone, B. J., Mayshar, Y., Yan, H., & Gu, C. (2014).  
739 Mfsd2a is critical for the formation and function of the blood-brain barrier. *Nature*,  
740 *509*(7501), 507-511. doi:10.1038/nature13324
- 741 Beutel, O., Maraschini, R., Pombo-Garcia, K., Martin-Lemaitre, C., & Honigsmann, A. (2019).  
742 Phase Separation of Zonula Occludens Proteins Drives Formation of Tight Junctions.  
743 *Cell*, *179*(4), 923-936 e911. doi:10.1016/j.cell.2019.10.011
- 744 Brightman, M. W., & Reese, T. S. (1969). Junctions between intimately apposed cell  
745 membranes in the vertebrate brain. *J Cell Biol*, *40*(3), 648-677.  
746 doi:10.1083/jcb.40.3.648
- 747 Burgert, A., Letschert, S., Doose, S., & Sauer, M. (2015). Artifacts in single-molecule  
748 localization microscopy. *Histochem Cell Biol*, *144*(2), 123-131. doi:10.1007/s00418-  
749 015-1340-4
- 750 Butt, A. M., Jones, H. C., & Abbott, N. J. (1990). Electrical resistance across the blood-brain  
751 barrier in anaesthetized rats: a developmental study. *J Physiol*, *429*, 47-62.
- 752 Castro Dias, M., Coisne, C., Baden, P., Enzmann, G., Garrett, L., Becker, L., . . . Engelhardt,  
753 B. (2019). Claudin-12 is not required for blood-brain barrier tight junction function.  
754 *Fluids Barriers CNS*, *16*(1), 30.
- 755 Chow, B. W., & Gu, C. (2017). Gradual Suppression of Transcytosis Governs Functional  
756 Blood-Retinal Barrier Formation. *Neuron*, *93*(6), 1325-1333 e1323.
- 757 Daneman, R., Zhou, L., Kebede, A. A., & Barres, B. A. (2010). Pericytes are required for  
758 blood-brain barrier integrity during embryogenesis. *Nature*, *468*(7323), 562-566.  
759 doi:10.1038/nature09513
- 760 Dempsey, G. T., Vaughan, J. C., Chen, K. H., Bates, M., & Zhuang, X. (2011). Evaluation of  
761 fluorophores for optimal performance in localization-based super-resolution imaging.  
762 *Nat Methods*, *8*(12), 1027-1036.

- 763 Dziegielewska, K. M., Evans, C. A., Malinowska, D. H., Mollgard, K., Reynolds, J. M.,  
764 Reynolds, M. L., & Saunders, N. R. (1979). Studies of the development of brain  
765 barrier systems to lipid insoluble molecules in fetal sheep. *J Physiol*, *292*, 207-231.
- 766 Falik, D., Rabinski, T., Zlotnik, D., Eshel, R., Zorsky, M., Garin-Shkolnik, T., . . . Vatine, G.  
767 D. (2020). Generation and characterization of iPSC lines (BGUi004-A, BGUi005-A)  
768 from two identical twins with polyalanine expansion in the paired-like homeobox 2B  
769 (PHOX2B) gene. *Stem Cell Res*, *48*, 101955. doi:10.1016/j.scr.2020.101955
- 770 Furuse, M., Fujita, K., Hiiiragi, T., Fujimoto, K., & Tsukita, S. (1998). Claudin-1 and -2:  
771 novel integral membrane proteins localizing at tight junctions with no sequence  
772 similarity to occludin. *J Cell Biol*, *141*(7), 1539-1550.
- 773 Furuse, M., Hirase, T., Itoh, M., Nagafuchi, A., Yonemura, S., Tsukita, S., & Tsukita, S.  
774 (1993). Occludin: a novel integral membrane protein localizing at tight junctions. *J*  
775 *Cell Biol*, *123*(6 Pt 2), 1777-1788.
- 776 Greene, C., Kealy, J., Humphries, M. M., Gong, Y., Hou, J., Hudson, N., . . . Campbell, M.  
777 (2018). Dose-dependent expression of claudin-5 is a modifying factor in  
778 schizophrenia. *Mol Psychiatry*, *23*(11), 2156-2166.
- 779 Hagan, N., & Ben-Zvi, A. (2015). The molecular, cellular, and morphological components of  
780 blood-brain barrier development during embryogenesis. *Semin Cell Dev Biol*, *38*, 7-  
781 15. doi:10.1016/j.semcdb.2014.12.006
- 782 Haseloff, R. F., Dithmer, S., Winkler, L., Wolburg, H., & Blasig, I. E. (2015).  
783 Transmembrane proteins of the tight junctions at the blood-brain barrier: structural  
784 and functional aspects. *Semin Cell Dev Biol*, *38*, 16-25.  
785 doi:10.1016/j.semcdb.2014.11.004
- 786 Jagadeesan, S., Workman, M. J., Herland, A., Svendsen, C. N., & Vatine, G. D. (2020).  
787 Generation of a Human iPSC-Based Blood-Brain Barrier Chip. *J Vis Exp*(157).  
788 doi:10.3791/60925
- 789 Kealy, J., Greene, C., & Campbell, M. (2018). Blood-brain barrier regulation in psychiatric  
790 disorders. *Neurosci Lett*, 133664. doi:10.1016/j.neulet.2018.06.033
- 791 Knowland, D., Arac, A., Sekiguchi, K. J., Hsu, M., Lutz, S. E., Perrino, J., . . . Agalliu, D.  
792 (2014). Stepwise recruitment of transcellular and paracellular pathways underlies  
793 blood-brain barrier breakdown in stroke. *Neuron*, *82*(3), 603-617.
- 794 Koto, T., Takubo, K., Ishida, S., Shinoda, H., Inoue, M., Tsubota, K., . . . Ikeda, E. (2007).  
795 Hypoxia disrupts the barrier function of neural blood vessels through changes in the  
796 expression of claudin-5 in endothelial cells. *Am J Pathol*, *170*(4), 1389-1397.
- 797 Langen, U. H., Ayloo, S., & Gu, C. (2019). Development and Cell Biology of the Blood-  
798 Brain Barrier. *Annu Rev Cell Dev Biol*, *35*, 591-613. doi:10.1146/annurev-cellbio-  
799 100617-062608
- 800 Licht, T., Dor-Wollman, T., Ben-Zvi, A., Rothe, G., & Keshet, E. (2015). Vessel maturation  
801 schedule determines vulnerability to neuronal injuries of prematurity. *J Clin Invest*,  
802 *125*(3), 1319-1328.
- 803 Liebner, S., Dijkhuizen, R. M., Reiss, Y., Plate, K. H., Agalliu, D., & Constantin, G. (2018).  
804 Functional morphology of the blood-brain barrier in health and disease. *Acta*  
805 *Neuropathol*, *135*(3), 311-336.
- 806 Lippmann, E. S., Al-Ahmad, A., Azarin, S. M., Palecek, S. P., & Shusta, E. V. (2014). A  
807 retinoic acid-enhanced, multicellular human blood-brain barrier model derived from  
808 stem cell sources. *Sci Rep*, *4*, 4160. doi:10.1038/srep04160
- 809 Lippmann, E. S., Azarin, S. M., Kay, J. E., Nessler, R. A., Wilson, H. K., Al-Ahmad, A., . . .  
810 Shusta, E. V. (2012). Derivation of blood-brain barrier endothelial cells from human  
811 pluripotent stem cells. *Nat Biotechnol*, *30*(8), 783-791. doi:10.1038/nbt.2247

- 812 Martin-Padura, I., Lostaglio, S., Schneemann, M., Williams, L., Romano, M., Fruscella, P., . . .  
813 . Dejana, E. (1998). Junctional adhesion molecule, a novel member of the  
814 immunoglobulin superfamily that distributes at intercellular junctions and modulates  
815 monocyte transmigration. *J Cell Biol*, *142*(1), 117-127.
- 816 Morita, K., Sasaki, H., Furuse, M., & Tsukita, S. (1999). Endothelial claudin: claudin-  
817 5/TMVCF constitutes tight junction strands in endothelial cells. *J Cell Biol*, *147*(1),  
818 185-194.
- 819 Nitta, T., Hata, M., Gotoh, S., Seo, Y., Sasaki, H., Hashimoto, N., . . . Tsukita, S. (2003).  
820 Size-selective loosening of the blood-brain barrier in claudin-5-deficient mice. *J Cell*  
821 *Biol*, *161*(3), 653-660.
- 822 Ovesny, M., Krizek, P., Borkovec, J., Svindrych, Z., & Hagen, G. M. (2014).  
823 ThunderSTORM: a comprehensive ImageJ plug-in for PALM and STORM data  
824 analysis and super-resolution imaging. *Bioinformatics*, *30*(16), 2389-2390.
- 825 Reese, T. S., & Karnovsky, M. J. (1967). Fine structural localization of a blood-brain barrier  
826 to exogenous peroxidase. *J Cell Biol*, *34*(1), 207-217. doi:10.1083/jcb.34.1.207
- 827 Saunders, N. R., Liddelow, S. A., & Dziegielewska, K. M. (2012). Barrier mechanisms in the  
828 developing brain. *Front Pharmacol*, *3*, 46. doi:10.3389/fphar.2012.00046
- 829 Schlingmann, B., Overgaard, C. E., Molina, S. A., Lynn, K. S., Mitchell, L. A., Dorsainvil  
830 White, S., . . . Koval, M. (2016). Regulation of claudin/zonula occludens-1 complexes  
831 by hetero-claudin interactions. *Nat Commun*, *7*, 12276.
- 832 Sohet, F., Lin, C., Munji, R. N., Lee, S. Y., Ruderisch, N., Soung, A., . . . Daneman, R.  
833 (2015). LSR/angulin-1 is a tricellular tight junction protein involved in blood-brain  
834 barrier formation. *J Cell Biol*, *208*(6), 703-711.
- 835 Sweeney, M. D., Sagare, A. P., & Zlokovic, B. V. (2018). Blood-brain barrier breakdown in  
836 Alzheimer disease and other neurodegenerative disorders. *Nat Rev Neurol*, *14*(3), 133-  
837 150.
- 838 van de Linde, S., Loschberger, A., Klein, T., Heidbreder, M., Wolter, S., Heilemann, M., &  
839 Sauer, M. (2011). Direct stochastic optical reconstruction microscopy with standard  
840 fluorescent probes. *Nat Protoc*, *6*(7), 991-1009. doi:10.1038/nprot.2011.336
- 841 Vanlandewijck, M., He, L., Mae, M. A., Andrae, J., Ando, K., Del Gaudio, F., . . . Betsholtz,  
842 C. (2018). A molecular atlas of cell types and zonation in the brain vasculature.  
843 *Nature*, *554*(7693), 475-480. doi:10.1038/nature25739
- 844 Vatine, G. D., Al-Ahmad, A., Barriga, B. K., Svendsen, S., Salim, A., Garcia, L., . . .  
845 Svendsen, C. N. (2017). Modeling Psychomotor Retardation using iPSCs from  
846 MCT8-Deficient Patients Indicates a Prominent Role for the Blood-Brain Barrier. *Cell*  
847 *Stem Cell*, *20*(6), 831-843.e835. doi:10.1016/j.stem.2017.04.002
- 848 Vatine, G. D., Barrile, R., Workman, M. J., Sances, S., Barriga, B. K., Rahnama, M., . . .  
849 Svendsen, C. N. (2019). Human iPSC-Derived Blood-Brain Barrier Chips Enable  
850 Disease Modeling and Personalized Medicine Applications. *Cell Stem Cell*, *24*(6),  
851 995-1005.e1006. doi:10.1016/j.stem.2019.05.011
- 852 Zhang, J., Carver, C. M., Choveau, F. S., & Shapiro, M. S. (2016). Clustering and Functional  
853 Coupling of Diverse Ion Channels and Signaling Proteins Revealed by Super-  
854 resolution STORM Microscopy in Neurons. *Neuron*, *92*(2), 461-478.
- 855 Zhang, Y., Chen, K., Sloan, S. A., Bennett, M. L., Scholze, A. R., O'Keefe, S., . . . Wu, J. Q.  
856 (2014). An RNA-sequencing transcriptome and splicing database of glia, neurons, and  
857 vascular cells of the cerebral cortex. *J Neurosci*, *34*(36), 11929-11947.
- 858 Zhao, Z., Nelson, A. R., Betsholtz, C., & Zlokovic, B. V. (2015). Establishment and  
859 Dysfunction of the Blood-Brain Barrier. *Cell*, *163*(5), 1064-1078.

860 Zhong, Z., Deane, R., Ali, Z., Parisi, M., Shapovalov, Y., O'Banion, M. K., . . . Zlokovic, B.  
861 V. (2008). ALS-causing SOD1 mutants generate vascular changes prior to motor  
862 neuron degeneration. *Nat Neurosci*, *11*(4), 420-422.

863 Zlokovic, B. V. (2008). The blood-brain barrier in health and chronic neurodegenerative  
864 disorders. *Neuron*, *57*(2), 178-201. doi:10.1016/j.neuron.2008.01.003

865

866

**Supplementary Figure S1 Total claudin-5 protein levels in bEND.3 cells and iBMECs TEER are elevated along days in culture**

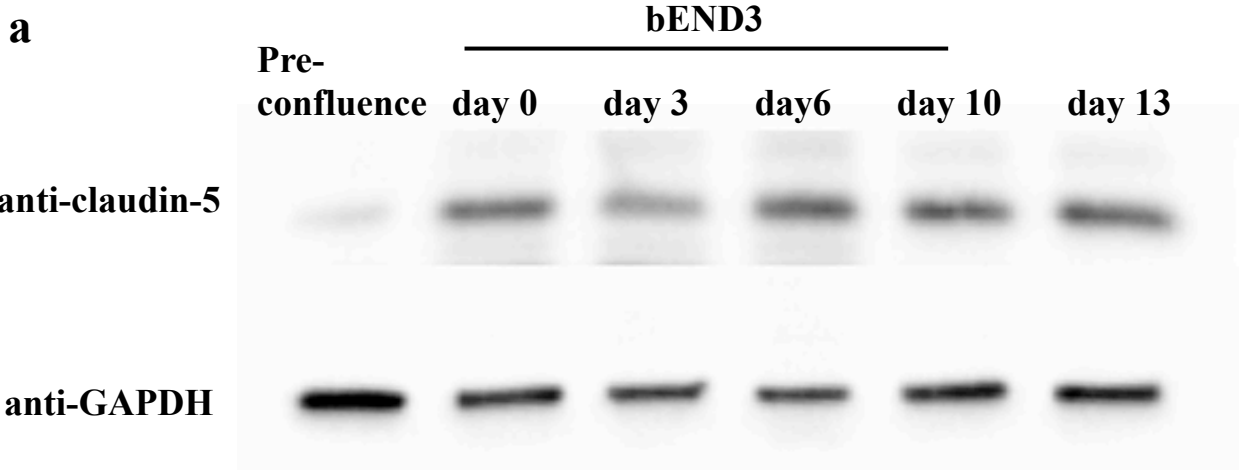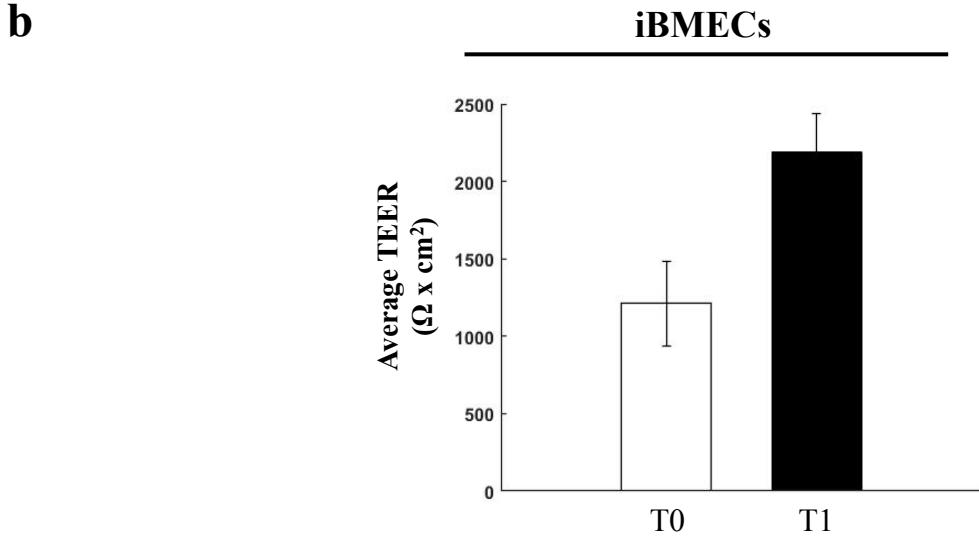

867 **Supplementary Figures**

868

869 **Supplementary Figure S1: Total claudin-5 protein levels in bEND.3 cells and iBMECs**

870 **TEER are elevated with time in culture. a,** Total claudin-5 protein levels in bEND.3 cells

871 rise with time in culture as shown in a representative western blot analysis. n=4. **b,** Enhanced

872 TJ function demonstrated by doubling of TEER (average change in TEER across all

873 experiments) along 2-3 days of human brain microvascular endothelial-like cell (iBMECs)

874 culture (n=4 experiments/12 inserts).

875



## Supplementary Figure S2 Claudin-5 clustering properties

**a**

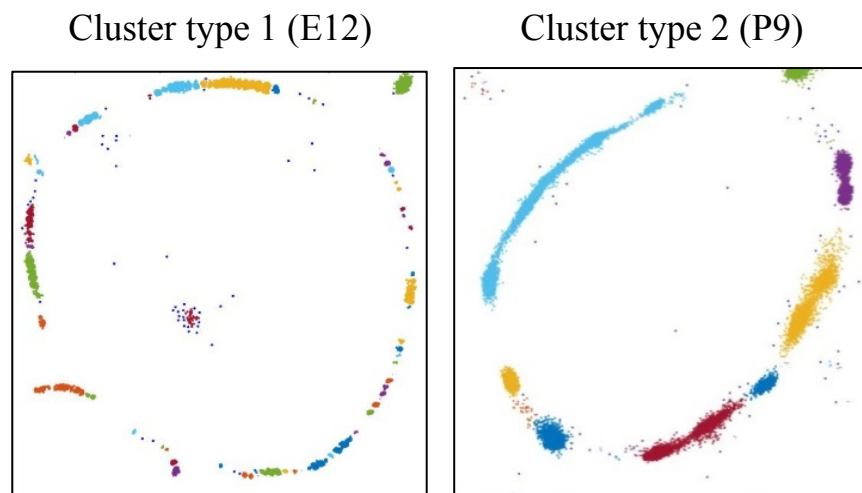

**b**

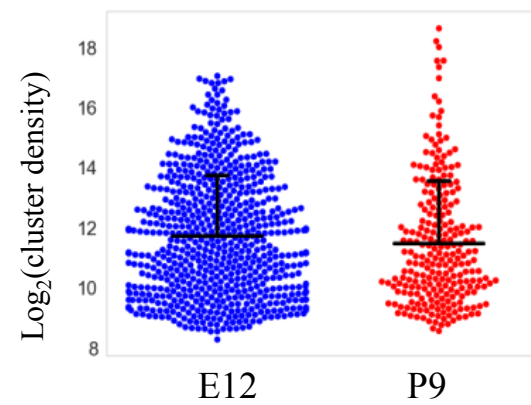

876 **Supplementary Figure S2 Claudin-5 clustering properties.** Analysis of Claudin-5  
877 clustering properties along the developmental BBB maturation axis, using custom clustering  
878 Matlab code (see methods for details). **a**, dSTORM imaging simulation of claudin-5  
879 immunostaining of E12 and P9 cortical capillary cross-sections (example of the two types of  
880 clustering simulations). We assumed that E12 capillaries had a more defused claudin-5  
881 appearance with longer clusters, but further analysis revealed that these are composed of  
882 many small clusters with relatively small gaps between them. Signals were defined to be  
883 clustered if their 2D location was smaller than 70 nm threshold distance. Cluster pattern  
884 visualization showing all points that belong to the same cluster with the same identifying  
885 color. **b**, Claudin-5 clustering-properties analysis showed that there were about 2.6 times  
886 more discrete clusters per capillary at E12 than at P9 (a set of 20 capillaries of each age).  
887 There was no dramatic difference in the distribution of signal densities between the two  
888 groups.  $n=3$  pups/embryos, 20 capillaries, 657 clusters (E12) and 246 clusters (P9). Data are  
889 mean $\pm$ s.e.m.

**Supplementary Figure S3 Molecular organization of ZO1 and occludin in mouse cortical BBB TJs**

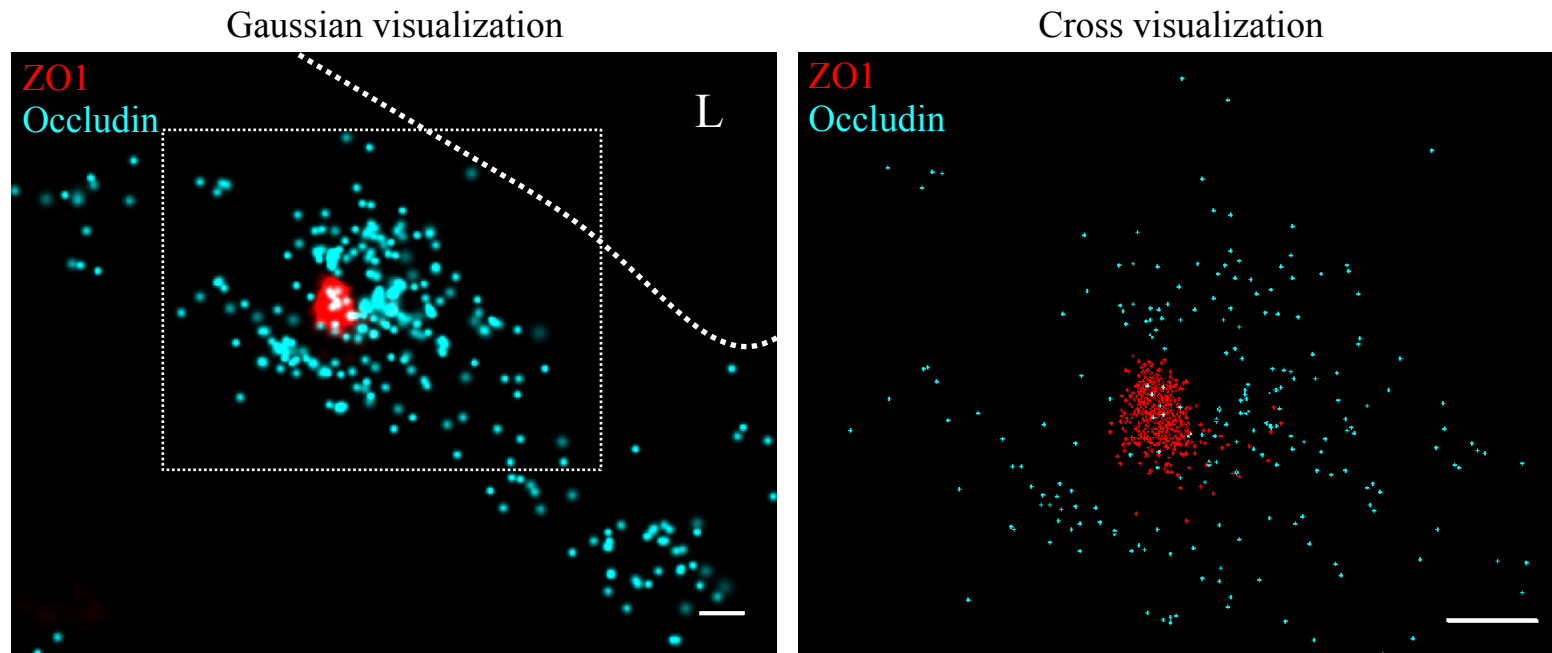

890 **Supplementary Figure S3 Molecular organization of ZO1 and occludin in mouse cortical**  
891 **BBB TJs.** Nano-scale molecular organization of TJ proteins in cortical capillaries of wild-  
892 type mice (E16). ZO1 display clustered organization (red) whereas occludin (cyan) was much  
893 less organized in discrete clusters and had more dispersed organization patterns. 2D-STORM  
894 imaging data (left) demonstrates that signals of TJ proteins are in close proximity and  
895 sometimes overlap ('Gaussian visualization' in which signal intensity correlates with  
896 localization precision). An inset with magnification (right) demonstrates the very high  
897 molecular density of ZO1 and the more diffuse organization of occludin ('Cross visualization'  
898 shows all resolved signals where each single-molecule signal displays as a cross). Scale bars,  
899 100 nm.  $n=40$  capillaries of 4 wild-type pups. L – capillary lumen.

Supplementary Figure S4 Claudin-5 clusters are in close proximity to ER and lysosomal markers

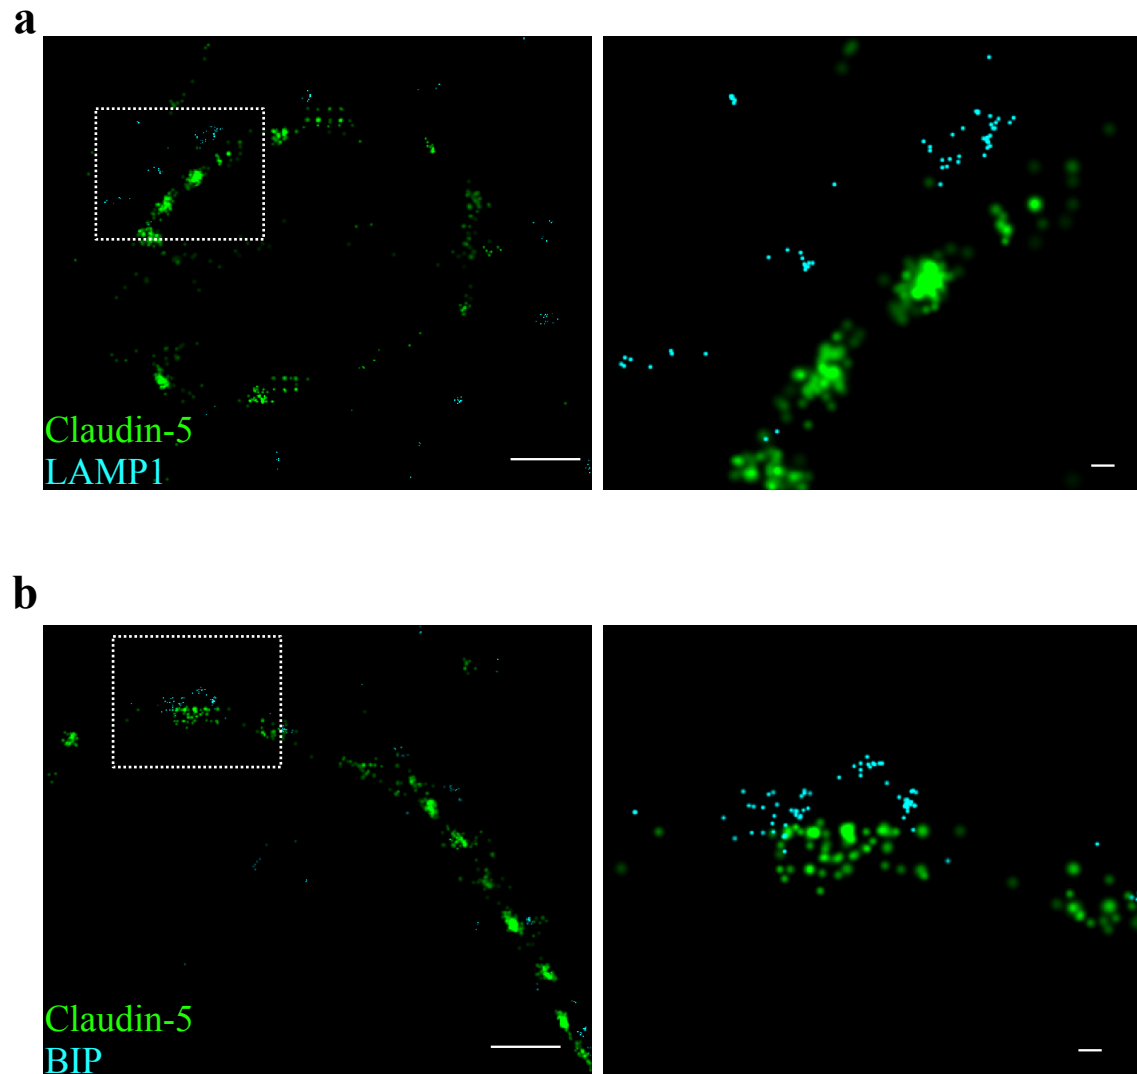

900 **Supplementary Figure S4: Claudin-5 clusters are in close proximity to ER and**  
901 **lysosomal markers.** Capillary cross-sections presented multiple claudin-5 clusters, therefore  
902 we tested potential claudin-5 localization to different cellular compartments. **a**, Claudin-5  
903 clusters in close proximity with the lysosomal marker LAMP1, suggesting lysosome  
904 localization. **b**, Claudin-5 clusters in close proximity with the ER marker BiP, suggesting ER  
905 localization. Scale bars, 1  $\mu\text{m}$  and 0.1  $\mu\text{m}$  in insets. n=8 capillaries.  
906  
907

### Supplementary Figure S5 clustering analysis – threshold distances

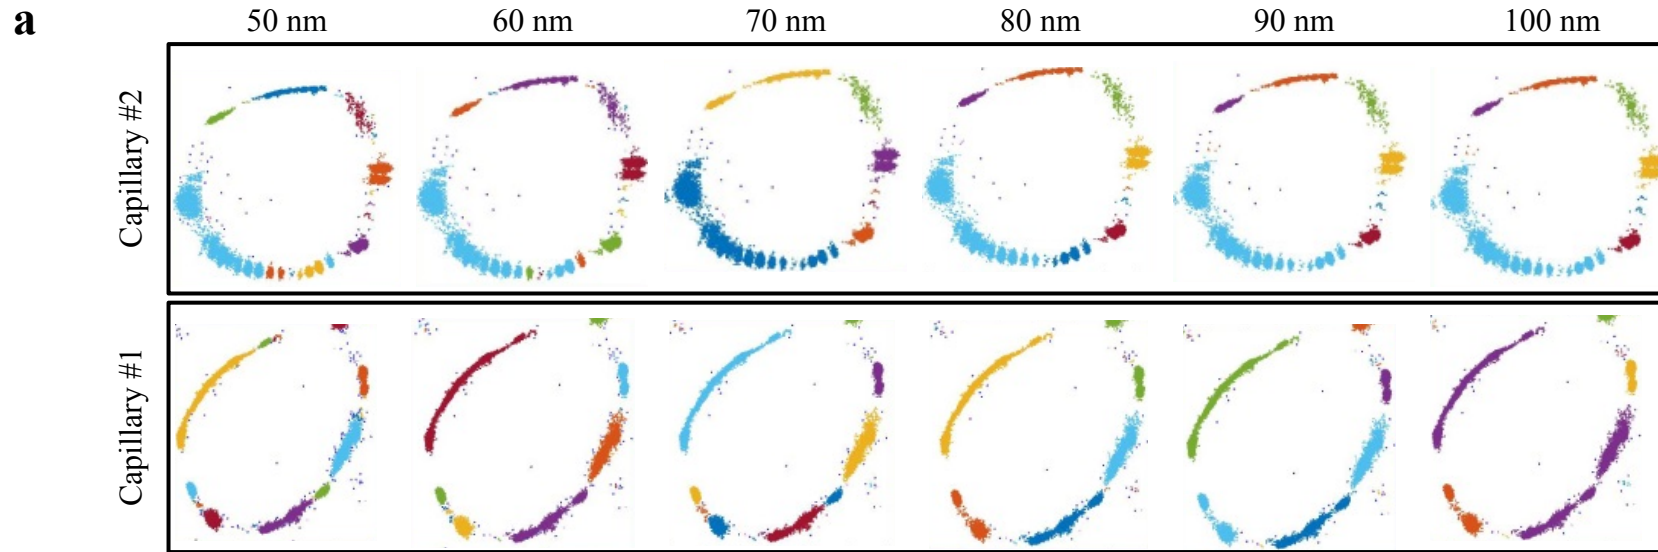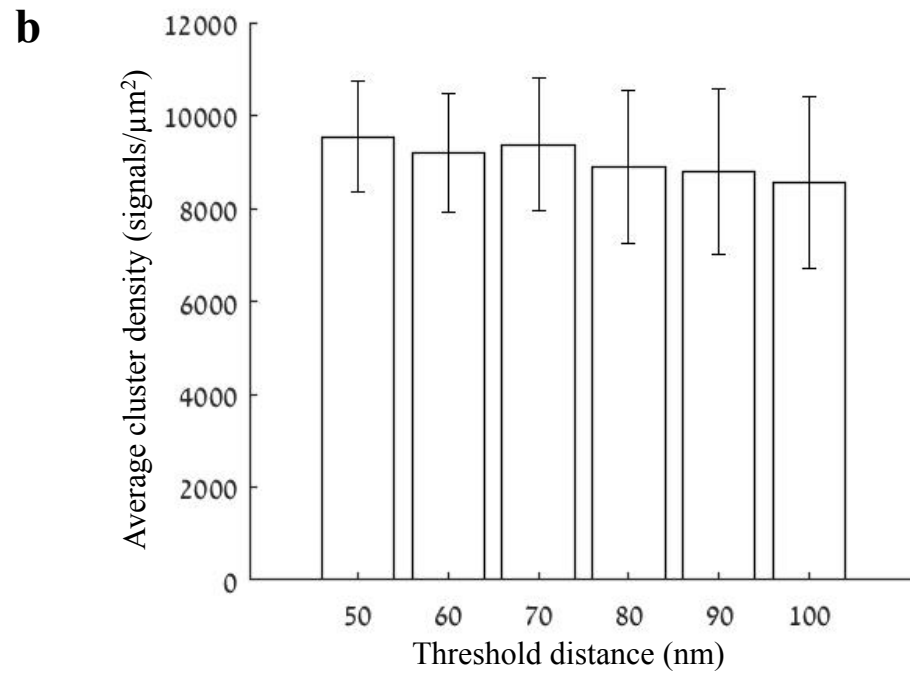

908 **Supplementary Figure S5 Distance threshold used for quantifications of clustering**  
909 **properties.** Analysis of claudin-5 clustering properties was done using a custom clustering  
910 Matlab code (see methods for details); our code calculated distances between each point and  
911 all other points in the point pattern of a Single molecule localization microscopy (SMLM)  
912 image. Then, we set a 70 nm distance threshold for defining molecules that belong to the  
913 same cluster. This distance threshold used for quantifications was determined based on the  
914 following parameters: minimal distance could not be below 40 nm (see methods for antibody  
915 labeling strategy); BBB TJs covering continuous contact points, as we evaluated in published  
916 TEM imaging data, range approximately up to 100 nm. Finally, we performed simulation of  
917 claudin-5 density in clusters, measured in different threshold distances between 50-100 nm. **a,**  
918 Two examples of simulations for claudin-5 cluster densities with different distance thresholds  
919 in P9 capillaries. Point patterns are visualized, while showing all points that belong to the  
920 same cluster with the same identifying color. Note that while clusters colors might change,  
921 the overall cluster organization is similar across tested threshold distances. **b,** Claudin-5  
922 cluster densities quantified using different distance thresholds did not yield significant  
923 differences.  $n=8$  capillaries. Data are mean $\pm$ s.e.m.  
924  
925  
926
